# Supplementary material for: 丙烯酰胺/2-丙烯酰胺基-2-甲基-丙磺酸钠/全氟己基乙基甲基丙烯酸酯三元共聚物的疏水缔合性质
Source: Royal Society of Chemistry journal article supplement (doi:10.1039/d3cp02426a), 2009-04-01
Supplement: d3cp02426a1.pdf [file d3cp02426a1.pdf]

Supporting information for

# Solvation of Serine-based Model Peptides and the Role of the Intramolecular OH··O Hydrogen Bond

Clemens Müller, Christian Merten\*

Ruhr Universität Bochum  
Fakultät für Chemie und Biochemie, Organische Chemie II  
Universitätsstraße 150  
44801 Bochum, Germany  
christian.merten@ruhr-uni-bochum.de  
www.mertenlab.de

|    |                                     |    |
|----|-------------------------------------|----|
| 1. | Conformational analysis of 1 .....  | 2  |
| 2. | Conformational analysis of 2 .....  | 6  |
| 3. | Selected Cartesian coordinate ..... | 12 |

# 1. Conformational analysis of **1**

**Table S1.** Characteristic geometries parameters, relative zero-point corrected and Gibbs Free Energies ( $\Delta E_{ZPC}$  and  $\Delta G_{298K}$  in kcal/mol), and Boltzmann weights of the computed conformers of **1** sorted by  $\Delta E_{ZPC}$ . Color coding of the table cells refers either to secondary structure family ( $\phi/\psi$ ) or t/g+/g- ( $\alpha/\beta$ ).

|        | $\phi_{Ser} =$<br>(CC $\alpha$ NC) | $\psi_{Ser} =$<br>(NCC $\alpha$ N) | $\alpha =$<br>(NC $\alpha$ CO) | $\beta =$<br>(C $\alpha$ COH) | $\Delta E_{ZPC}$  | $\Delta G_{298K}$ | pop( $\Delta E$ ) | pop( $\Delta G$ ) |
|--------|------------------------------------|------------------------------------|--------------------------------|-------------------------------|-------------------|-------------------|-------------------|-------------------|
| 1_c1a  | -83.0                              | 73.8                               | 58.7                           | 61.4                          | 0.0 <sup>a)</sup> | 0.0 <sup>a)</sup> | 56.3              | 30.2              |
| 1_c4b  | -127.7                             | 17.2                               | -171.6                         | -48.6                         | 1.20              | 0.83              | 7.4               | 7.4               |
| 1_c9a  | -151.3                             | -175.3                             | -168.7                         | 79.2                          | 1.30              | 1.03              | 6.3               | 5.3               |
| 1_c5a  | -124.3                             | 17.4                               | 60.5                           | 80.0                          | 1.33              | 0.22              | 6.0               | 20.8              |
| 1_c2b  | -84.2                              | 63.4                               | -179.7                         | -63.7                         | 1.44              | 1.39              | 4.9               | 2.9               |
| 1_c10a | -166.7                             | 164.7                              | -80.7                          | 40.8                          | 1.46              | 1.09              | 4.8               | 4.8               |
| 1_c5c  | -110.9                             | 2.4                                | 55.3                           | -178.3                        | 1.56              | 0.70              | 4.0               | 9.3               |
| 1_c9c  | -149.3                             | -176.5                             | -166.7                         | -174.6                        | 1.65              | 1.33              | 3.4               | 3.2               |
| 1_c11b | -146.7                             | 171.0                              | 62.3                           | -59.7                         | 2.28              | 1.65              | 1.2               | 1.9               |
| 1_c12a | -107.5                             | 148.1                              | -60.5                          | 55.8                          | 2.34              | 1.17              | 1.1               | 4.2               |
| 1_c8b  | -147.1                             | 158.8                              | -173.6                         | -85.3                         | 2.41              | 1.19              | 1.0               | 4.0               |
| 1_c6b  | -85.3                              | -17.2                              | -56.4                          | -70.5                         | 2.68              | 2.17              | 0.6               | 0.8               |
| 1_c14b | 76.8                               | -122.2                             | 79.9                           | -52.6                         | 2.96              | 2.90              | 0.4               | 0.2               |
| 1_c6a  | -110.1                             | 4.9                                | -65.5                          | 62.4                          | 3.08              | 2.05              | 0.3               | 0.9               |
| 1_c3a  | -83.6                              | 77.3                               | -65.2                          | 56.2                          | 3.09              | 2.61              | 0.3               | 0.4               |
| 1_c18b | 68.0                               | 29.7                               | -166.5                         | -58.1                         | 3.11              | 2.87              | 0.3               | 0.2               |
| 1_c6c  | -86.2                              | -14.9                              | -58.5                          | 179.5                         | 3.14              | 2.46              | 0.3               | 0.5               |
| 1_c3c  | -87.9                              | 68.7                               | -60.7                          | 178.5                         | 3.17              | 2.46              | 0.3               | 0.5               |
| 1_c3b  | -87.3                              | 70.7                               | -55.8                          | -68.0                         | 3.18              | 2.49              | 0.3               | 0.5               |
| 1_c11c | -147.0                             | 167.6                              | 67.0                           | -168.5                        | 3.43              | 2.53              | 0.2               | 0.4               |
| 1_c1c  | -84.1                              | 48.3                               | 49.3                           | 179.6                         | 3.55              | 3.45              | 0.1               | 0.1               |
| 1_c21b | 98.0                               | -14.3                              | 78.4                           | -63.2                         | 3.86              | 3.48              | 0.1               | 0.1               |
| 1_c22b | 75.5                               | -38.8                              | 80.4                           | -52.0                         | 3.92              | 4.20              | 0.1               | 0.0               |
| 1_c12c | -103.4                             | 127.5                              | -67.4                          | 172.3                         | 3.93              | 2.15              | 0.1               | 0.8               |
| 1_c13c | -83.3                              | 163.1                              | 61.5                           | -171.2                        | 4.03              | 2.77              | 0.1               | 0.3               |
| 1_c23a | 71.2                               | -51.4                              | -61.3                          | 69.0                          | 4.24              | 3.73              | 0.0               | 0.1               |
| 1_c25c | -120.5                             | -89.9                              | 58.2                           | -178.4                        | 4.34              | 2.97              | 0.0               | 0.2               |
| 1_c25b | -135.5                             | -87.7                              | 58.3                           | -68.8                         | 4.39              | 3.75              | 0.0               | 0.1               |
| 1_c23c | 76.8                               | -49.7                              | -61.9                          | 173.1                         | 4.62              | 4.21              | 0.0               | 0.0               |
| 1_c23b | 76.3                               | -49.1                              | -59.4                          | -73.3                         | 4.66              | 4.49              | 0.0               | 0.0               |
| 1_c15b | 70.0                               | 175.4                              | 83.8                           | -54.2                         | 4.68              | 4.78              | 0.0               | 0.0               |
| 1_c24b | 70.7                               | -17.3                              | -162.3                         | -41.2                         | 4.71              | 3.70              | 0.0               | 0.1               |
| 1_c26a | 167.2                              | -32.8                              | -82.0                          | 63.2                          | 4.72              | 4.19              | 0.0               | 0.0               |
| 1_c19a | 69.7                               | 24.0                               | -60.6                          | 73.8                          | 4.91              | 4.16              | 0.0               | 0.0               |
| 1_c19c | 71.2                               | 26.9                               | -59.6                          | 177.2                         | 4.95              | 4.34              | 0.0               | 0.0               |
| 1_c16c | 62.3                               | -164.2                             | -160.2                         | -173.4                        | 5.27              | 5.01              | 0.0               | 0.0               |
| 1_c19b | 72.2                               | 23.8                               | -58.5                          | -79.7                         | 5.42              | 4.84              | 0.0               | 0.0               |
| 1_c16a | 61.0                               | -160.8                             | -166.0                         | 70.7                          | 5.52              | 5.54              | 0.0               | 0.0               |
| 1_c24a | 73.3                               | -60.7                              | -178.2                         | 63.1                          | 5.53              | 5.26              | 0.0               | 0.0               |
| 1_c20a | 50.3                               | 51.0                               | 67.3                           | 59.3                          | 5.92              | 5.95              | 0.0               | 0.0               |
| 1_c24c | 74.1                               | -65.0                              | -168.8                         | -165.7                        | 5.96              | 5.88              | 0.0               | 0.0               |
| 1_c17a | 53.7                               | -143.9                             | -56.9                          | 55.0                          | 6.46              | 5.95              | 0.0               | 0.0               |
| 1_c7c  | -78.5                              | -32.9                              | -176.6                         | -177.7                        | 6.77              | 5.75              | 0.0               | 0.0               |
| 1_c22a | 64.0                               | -37.8                              | 59.7                           | 61.5                          | 7.23              | 6.90              | 0.0               | 0.0               |
| 1_c26b | -169.1                             | -22.3                              | -170.2                         | -42.6                         | 7.25              | 7.29              | 0.0               | 0.0               |
| 1_c17c | 60.1                               | -125.6                             | -62.8                          | 174.0                         | 7.71              | 6.41              | 0.0               | 0.0               |
| 1_c18a | 69.4                               | 34.3                               | -145.8                         | 74.8                          | 7.94              | 7.24              | 0.0               | 0.0               |
| 1_c22c | 62.6                               | -31.1                              | 70.2                           | 178.0                         | 7.97              | 7.83              | 0.0               | 0.0               |
| 1_c14c | 41.4                               | -119.7                             | 69.0                           | -177.6                        | 8.34              | 8.41              | 0.0               | 0.0               |
| 1_c20c | 57.4                               | 35.8                               | 55.7                           | 173.3                         | 9.49              | 9.35              | 0.0               | 0.0               |

<sup>a)</sup> referenced to E = -764.057414 hartree and G = -764.103747 hartree.

**Table S2.** Characteristic geometries parameters, relative zero-point corrected and Gibbs Free Energies ( $\Delta E_{ZPC}$  and  $\Delta G_{298K}$  in kcal/mol), and Boltzmann weights of the 25 lowest energy conformers of  $\mathbf{1}\cdots(\text{DMSO})_1$  sorted by  $\Delta E_{ZPC}$ . Color coding of the table cells refers either to secondary structure family ( $\phi/\psi$ ) or  $t/g+/-g-$  ( $\alpha/\beta$ ). The torsional angle definitions and conformer numbers are the same as used in Tab. S1.

|                                         | $\phi_{\text{Ser}}$ | $\psi_{\text{Ser}}$ | $\alpha$ | $\beta$ | Solvated H   | $\Delta E_{ZPC}$  | $\Delta G_{298K}$ | pop( $\Delta E$ ) | pop( $\Delta G$ ) |
|-----------------------------------------|---------------------|---------------------|----------|---------|--------------|-------------------|-------------------|-------------------|-------------------|
| 1_c5b_(DMSO) <sub>1</sub>               | -91.4               | -10.2               | 67.4     | -74.5   | BocNH / OH   | 0.0 <sup>a)</sup> | 1.27              | 24.5              | 5.8               |
| 1_c5c_(DMSO) <sub>1</sub>               | -103.1              | -3.7                | 55.7     | -169.6  | OH           | 0.45              | 0.0 <sup>a)</sup> | 11.6              | 49.8              |
| 1_c9c_(DMSO) <sub>1</sub>               | -148.4              | -174.4              | -166.6   | -166.7  | OH           | 0.57              | 1.09              | 9.4               | 8.0               |
| 1_c6a_(DMSO) <sub>1</sub>               | -82.0               | -20.6               | -63.5    | 83.6    | BocNH / OH   | 0.60              | 1.73              | 9.0               | 2.7               |
| 1_c9a_(DMSO) <sub>1</sub>               | -149.6              | -174.2              | -172.1   | 82.3    | OH           | 0.67              | 1.68              | 7.9               | 2.9               |
| 1_c5a_(DMSO) <sub>1</sub>               | -99.9               | -6.1                | 49.2     | 89.7    | OH           | 0.70              | 1.54              | 7.5               | 3.7               |
| 1_c9c_(DMSO) <sub>1</sub>               | -148.7              | -174.2              | -166.4   | -169.2  | OH           | 0.90              | 1.59              | 5.4               | 3.4               |
| 1_c8a_(DMSO) <sub>1</sub>               | -138.2              | 146.3               | 177.5    | 47.4    | OH           | 1.05              | 2.60              | 4.2               | 0.6               |
| 1_c6b_(DMSO) <sub>1</sub>               | -79.9               | -23.2               | -53.2    | -73.2   | OH           | 1.24              | 1.29              | 3.0               | 5.7               |
| 1_c6c_(DMSO) <sub>1</sub>               | -81.4               | -21.7               | -58.1    | 171.3   | OH           | 1.47              | 1.22              | 2.1               | 6.4               |
| 1_c10a_(DMSO) <sub>1</sub>              | -166.1              | 160.9               | -78.4    | 37.3    | NH           | 1.64              | 3.44              | 1.5               | 0.1               |
| 1_c4b_(DMSO) <sub>1</sub>               | -125.3              | 16.7                | -171.2   | -48.2   | BocNH        | 1.80              | 2.90              | 1.2               | 0.4               |
| 1_c5a_(DMSO) <sub>1</sub> <sup>b)</sup> | -96.2               | -8.8                | 49.0     | 89.6    | OH           | 1.82              | 2.75              | 1.1               | 0.5               |
| 1_c13b_(DMSO) <sub>1</sub>              | -78.0               | 159.9               | 73.2     | -64.5   | OH           | 1.85              | 3.94              | 1.1               | 0.1               |
| 1_c13a_(DMSO) <sub>1</sub>              | -92.1               | 115.3               | 56.6     | 47.7    | NHPr         | 2.12              | 3.39              | 0.7               | 0.2               |
| 1_c3a_(DMSO) <sub>1</sub>               | -86.5               | 73.1                | -62.1    | -68.1   | BocNH        | 2.14              | 3.35              | 0.7               | 0.2               |
| 1_c13c_(DMSO) <sub>1</sub>              | -75.5               | 163.5               | 59.4     | -170.9  | OH           | 2.19              | 2.47              | 0.6               | 0.8               |
| 1_c11c_(DMSO) <sub>1</sub>              | -144.4              | 166.3               | 66.0     | -172.2  | OH           | 2.22              | 2.73              | 0.6               | 0.5               |
| 1_c25c_(DMSO) <sub>1</sub>              | -110.2              | -91.4               | 57.5     | -178.9  | OH           | 2.24              | 2.80              | 0.6               | 0.4               |
| 1_c4Xb_(DMSO) <sub>1</sub>              | -125.6              | -6.0                | -169.9   | -39.0   | BocNH        | 2.28              | 3.09              | 0.5               | 0.3               |
| 1_c12a_(DMSO) <sub>1</sub>              | -117.1              | 146.8               | -64.6    | 89.4    | OH           | 2.29              | 2.25              | 0.5               | 1.1               |
| 1_c25b_(DMSO) <sub>1</sub>              | -108.3              | -96.6               | 67.0     | -65.5   | BocNH / OH   | 2.30              | 3.93              | 0.5               | 0.1               |
| 1_c4b_(DMSO) <sub>1</sub>               | -127.7              | -7.2                | -169.8   | -38.4   | NPrH / BocNH | 2.33              | 3.34              | 0.5               | 0.2               |
| 1_c25b_(DMSO) <sub>1</sub>              | -107.5              | -99.2               | 67.7     | -63.7   | BocNH / OH   | 2.34              | 4.25              | 0.5               | 0.0               |
| 1_c12a_(DMSO) <sub>1</sub>              | -111.3              | 149.0               | -59.6    | 58.2    | NPrH         | 2.37              | 2.47              | 0.4               | 0.8               |
| 1_c11b_(DMSO) <sub>1</sub>              | -146.7              | 167.5               | 61.1     | -60.9   | NPrH         | 2.40              | 3.07              | 0.4               | 0.3               |
| 1_c6a_(DMSO) <sub>1</sub>               | -96.6               | -30.4               | -62.9    | 57.2    | NPrH/BocNH   | 2.59              | 3.58              | 0.3               | 0.1               |
| 1_c12c_(DMSO) <sub>1</sub>              | -118.8              | 144.3               | -66.7    | 171.5   | OH           | 2.60              | 1.78              | 0.3               | 2.4               |
| 1_c13a_(DMSO) <sub>1</sub>              | -82.3               | 124.3               | 56.3     | 46.7    | NPrH         | 2.72              | 4.49              | 0.2               | 0.0               |
| 1_c3b_(DMSO) <sub>1</sub>               | -87.0               | 71.7                | -65.3    | 177.1   | BocNH        | 2.80              | 3.07              | 0.2               | 0.3               |

<sup>a)</sup> referenced to E = -1317.2429 hartree and G = -1317.30348 hartree

<sup>b)</sup> Boc group in cis-conformation

**Table S3.** Characteristic geometries parameters, relative zero-point corrected and Gibbs Free Energies ( $\Delta E_{ZPC}$  and  $\Delta G_{298K}$  in kcal/mol), and Boltzmann weights of the 30 lowest energy conformers of **1**·(DMSO)<sub>2</sub> sorted by  $\Delta E_{ZPC}$ . Color coding of the table cells refers either to secondary structure family ( $\phi/\psi$ ) or  $t/g+g-$  ( $\alpha/\beta$ ). The torsional angle definitions are those used in Tab. S1.

|                            | $\phi_{Ser}$ | $\psi_{Ser}$ | $\alpha$ | $\beta$ | Solvated H      | $\Delta E_{ZPC}$  | $\Delta G_{298K}$ | pop( $\Delta E$ ) | pop( $\Delta G$ ) |
|----------------------------|--------------|--------------|----------|---------|-----------------|-------------------|-------------------|-------------------|-------------------|
| 1_c5c_(DMSO) <sub>2</sub>  | -100.6       | -20.1        | 62.1     | 176.4   | OH + NPrH/BocNH | 0.0 <sup>a)</sup> | 2.80              | 7.8               | 0.3               |
| 1_c13b_(DMSO) <sub>2</sub> | -77.7        | 159.3        | 73.2     | -64.5   | OH/BocNH + NPrH | 0.01              | 1.95              | 7.6               | 1.1               |
| 1_c8c_(DMSO) <sub>2</sub>  | -143.2       | 132.3        | -177.7   | -178.5  | OH + NPrH       | 0.07              | 0.0 <sup>a)</sup> | 6.9               | 30.0              |
| 1_c5c_(DMSO) <sub>2</sub>  | -104.7       | -21.1        | 62.6     | -171.2  | OH + NPrH/BocNH | 0.13              | 2.24              | 6.2               | 0.7               |
| 1_c11c_(DMSO) <sub>2</sub> | -145.0       | 163.8        | 65.9     | -173.3  | OH + NPrH       | 0.19              | 0.18              | 5.7               | 22.3              |
| 1_c11b_(DMSO) <sub>2</sub> | -147.4       | 164.9        | 66.6     | -86.0   | OH + NPrH       | 0.24              | 1.80              | 5.2               | 1.4               |
| 1_c8c_(DMSO) <sub>2</sub>  | -145.4       | 137.5        | -175.5   | -171.8  | OH + NPrH       | 0.31              | 1.53              | 4.6               | 2.3               |
| 1_c5c_(DMSO) <sub>2</sub>  | -105.0       | -16.7        | 63.0     | -174.5  | OH + NPrH/BocNH | 0.44              | 2.58              | 3.7               | 0.4               |
| 1_c12c_(DMSO) <sub>2</sub> | -120.0       | 145.3        | -66.9    | 165.4   | OH + NPrH       | 0.47              | 0.34              | 3.5               | 16.8              |
| 1_c8b_(DMSO) <sub>2</sub>  | -138.0       | 133.6        | -172.8   | -95.4   | OH + NPrH       | 0.48              | 1.66              | 3.5               | 1.8               |
| 1_c6b_(DMSO) <sub>2</sub>  | -98.8        | -8.8         | -61.8    | -76.0   | OH + BocNH      | 0.51              | 0.93              | 3.3               | 6.2               |
| 1_c6a_(DMSO) <sub>2</sub>  | -78.9        | -26.1        | -64.2    | 80.9    | OH/BocNH + NPrH | 0.51              | 3.20              | 3.3               | 0.1               |
| 1_c13c_(DMSO) <sub>2</sub> | -74.5        | 161.9        | 58.7     | -170.8  | OH + NPrH       | 0.52              | 0.88              | 3.2               | 6.8               |
| 1_c6a_(DMSO) <sub>2</sub>  | -92.9        | -32.6        | -68.1    | 89.7    | OH + NPrH/BocNH | 0.55              | 2.81              | 3.1               | 0.3               |
| 1_c5c_(DMSO) <sub>2</sub>  | -109.9       | -0.5         | 63.5     | -177.2  | OH + BocNH      | 0.58              | 2.04              | 2.9               | 1.0               |
| 1_c8a_(DMSO) <sub>2</sub>  | -136.4       | 123.6        | 179.7    | 92.0    | OH + NPrH       | 0.61              | 2.26              | 2.8               | 0.7               |
| 1_c9a_(DMSO) <sub>2</sub>  | -107.5       | -165.1       | -172.0   | 76.0    | OH + BocNH      | 0.70              | 2.55              | 2.4               | 0.4               |
| 1_c5c_(DMSO) <sub>2</sub>  | -102.6       | -2.9         | 64.0     | -179.6  | OH + BocNH      | 0.72              | 2.66              | 2.3               | 0.3               |
| 1_c5a_(DMSO) <sub>2</sub>  | -100.0       | -20.2        | 56.6     | 94.3    | OH + NPrH/BocNH | 0.76              | 3.32              | 2.2               | 0.1               |
| 1_c9c_(DMSO) <sub>2</sub>  | -108.0       | -166.6       | -167.0   | -166.9  | OH + BocNH      | 0.77              | 2.55              | 2.1               | 0.4               |
| 1_c8b_(DMSO) <sub>2</sub>  | -139.0       | 133.5        | -172.7   | -95.5   | OH + NPrH       | 0.83              | 2.72              | 1.9               | 0.3               |
| 1_c6c_(DMSO) <sub>2</sub>  | -102.5       | -4.6         | -64.1    | -174.6  | OH + BocNH      | 0.85              | 1.78              | 1.9               | 1.5               |
| 1_c6a_(DMSO) <sub>2</sub>  | -105.4       | -2.8         | -68.8    | 87.7    | OH + BocNH      | 0.93              | 3.48              | 1.6               | 0.1               |
| 1_c6b_(DMSO) <sub>2</sub>  | -76.1        | -29.6        | -54.6    | -76.5   | OH + NPrH       | 0.97              | 2.73              | 1.5               | 0.3               |
| 1_c5a_(DMSO) <sub>2</sub>  | -98.1        | -6.4         | 63.8     | 106.2   | OH + BocNH      | 1.08              | 3.02              | 1.3               | 0.2               |
| 1_c7c_(DMSO) <sub>2</sub>  | -97.7        | -50.9        | -179.8   | -174.9  | OH + NPrH/BocNH | 1.09              | 2.30              | 1.2               | 0.6               |
| 1_c12a_(DMSO) <sub>2</sub> | -117.3       | 153.5        | -67.4    | 86.4    | OH + NPrH       | 1.13              | 2.52              | 1.2               | 0.4               |
| 1_c6c_(DMSO) <sub>2</sub>  | -76.5        | -29.2        | -58.6    | 170.4   | OH + NPrH       | 1.20              | 2.55              | 1.0               | 0.4               |
| 1_c13c_(DMSO) <sub>2</sub> | -99.7        | 122.2        | -176.7   | -165.0  | OH + BocNH      | 1.55              | 1.97              | 0.6               | 1.1               |
| 1_c12a_(DMSO) <sub>2</sub> | -98.4        | 137.1        | -69.4    | 96.0    | OH + BocNH      | 1.59              | 4.09              | 0.5               | 0.0               |

<sup>a)</sup> referenced to E = -1870.419491 hartree and G = -1870.493012 hartree

**Table S4.** Characteristic geometries parameters, relative zero-point corrected and Gibbs Free Energies ( $\Delta E_{ZPC}$  and  $\Delta G_{298K}$  in kcal/mol), and Boltzmann weights of the 15 lowest energy conformers of **1**·(DMSO)<sub>3</sub> sorted by  $\Delta E_{ZPC}$ . Color coding of the table cells refers either to secondary structure family ( $\phi/\psi$ ) or t/g+/-g- ( $\alpha/\beta$ ). The torsional angle definitions are those used in Tab. S1.

|                            | $\phi_{Ser}$ | $\psi_{Ser}$ | $\alpha$ | $\beta$ | $\Delta E_{ZPC}$  | $\Delta G_{298K}$ | pop( $\Delta E$ ) | pop( $\Delta G$ ) |
|----------------------------|--------------|--------------|----------|---------|-------------------|-------------------|-------------------|-------------------|
| 1_c12a_(DMSO) <sub>3</sub> | -98.7        | 140.6        | -68.9    | 96.8    | 0.0 <sup>a)</sup> | 0.73              | 27.4              | 12.1              |
| 1_c13c_(DMSO) <sub>3</sub> | -102.9       | 123.5        | -178.3   | -173.2  | 0.37              | 0.62              | 14.7              | 14.5              |
| 1_c8c_(DMSO) <sub>3</sub>  | -98.4        | 124.1        | -178.0   | -172.8  | 0.52              | 0.0 <sup>a)</sup> | 11.5              | 41.6              |
| 1_c12c_(DMSO) <sub>3</sub> | -98.8        | 140.1        | -66.6    | 174.0   | 0.61              | 1.08              | 9.8               | 6.7               |
| 1_c8b_(DMSO) <sub>3</sub>  | -101.7       | 121.3        | -175.2   | -118.0  | 0.68              | 0.61              | 8.7               | 14.7              |
| 1_c8a_(DMSO) <sub>3</sub>  | -112.9       | 116.0        | 179.8    | 89.3    | 0.76              | 1.59              | 7.6               | 2.8               |
| 1_c13b_(DMSO) <sub>3</sub> | -103.0       | 124.4        | -174.9   | -105.9  | 1.07              | 1.62              | 4.5               | 2.7               |
| 1_c6b_(DMSO) <sub>3</sub>  | -99.2        | -12.3        | -62.9    | -76.8   | 1.19              | 2.31              | 3.7               | 0.8               |
| 1_c11c_(DMSO) <sub>3</sub> | -126.1       | 154.6        | 66.5     | -173.6  | 1.34              | 2.39              | 2.9               | 0.7               |
| 1_c13c_(DMSO) <sub>3</sub> | -95.4        | 160.9        | 66.4     | -172.0  | 1.41              | 1.86              | 2.5               | 1.8               |
| 1_c11b_(DMSO) <sub>3</sub> | -130.4       | 160.7        | 64.0     | -96.9   | 1.41              | 2.80              | 2.5               | 0.4               |
| 1_c5c_(DMSO) <sub>3</sub>  | -120.7       | 5.7          | 63.2     | -179.4  | 1.83              | 3.30              | 1.3               | 0.2               |
| 1_c11b_(DMSO) <sub>3</sub> | -131.7       | 158.3        | 63.5     | -97.5   | 1.94              | 2.93              | 1.0               | 0.3               |
| 1_c19c_(DMSO) <sub>3</sub> | 62.3         | 40.7         | -60.3    | 177.4   | 2.53              | 3.42              | 0.4               | 0.1               |
| 1_c19c_(DMSO) <sub>3</sub> | 61.4         | 42.3         | -60.0    | -177.2  | 2.61              | 3.84              | 0.3               | 0.1               |

<sup>a)</sup> referenced to E = -2423.59658 hartree and G = -2423.685341 hartree

## 2. Conformational analysis of 2

**Table S5.** Characteristic geometries parameters, relative zero-point corrected and Gibbs Free Energies ( $\Delta E_{ZPC}$  and  $\Delta G_{298K}$  in kcal/mol), and Boltzmann weights of all optimized conformers of **2** sorted by  $\Delta E_{ZPC}$ . Color coding of the table cells refers either to secondary structure family ( $\phi/\psi$ ) or t/g+/g- ( $\alpha/\beta/\gamma$ ).

|                       | $\phi_{Ser}$ | $\psi_{Ser}$ | $\phi_{Phe}$ | $\psi_{Phe}$ | $\alpha$ | $\beta$ | $\gamma$ | $\Delta E_{ZPC}$  | $\Delta G_{298K}$ | pop( $\Delta E$ ) | pop( $\Delta G$ ) |
|-----------------------|--------------|--------------|--------------|--------------|----------|---------|----------|-------------------|-------------------|-------------------|-------------------|
| 2( $\beta, pp_{II}$ ) | -147.0       | 160.6        | -69.9        | 151.3        | -176.9   | -81.6   | -172.1   | 0.0 <sup>a)</sup> | 0.85              | 11.6              | 3.8               |
|                       | -147.5       | 160.3        | -71.0        | 155.0        | -176.9   | -80.9   | -62.2    | 0.00              | 0.50              | 11.6              | 6.8               |
|                       | -145.2       | 160.0        | -78.6        | 165.2        | -175.8   | -80.2   | 57.9     | 0.90              | 1.82              | 2.5               | 0.7               |
| 2( $\delta, \delta$ ) | -75.0        | -14.9        | -101.6       | 5.7          | 51.9     | 75.6    | -63.7    | 0.56              | 1.67              | 4.5               | 0.9               |
|                       | -78.8        | -8.3         | -95.7        | 1.9          | 55.7     | -178.9  | 56.9     | 0.93              | 2.25              | 2.4               | 0.4               |
|                       | -79.6        | -7.6         | -93.9        | 1.0          | 53.2     | 80.6    | 57.0     | 0.95              | 1.74              | 2.4               | 0.8               |
|                       | -72.0        | -20.8        | -88.7        | -2.4         | -54.0    | -73.5   | -64.3    | 0.96              | 2.05              | 2.3               | 0.5               |
|                       | -72.6        | -20.1        | -91.4        | 1.4          | -54.3    | -72.8   | 56.4     | 1.12              | 2.86              | 1.8               | 0.1               |
|                       | -79.4        | -7.0         | -89.8        | -4.0         | 54.3     | 177.7   | -65.9    | 1.27              | 1.85              | 1.4               | 0.7               |
|                       | -72.8        | -19.7        | -88.9        | -2.4         | -57.1    | 175.8   | -64.3    | 1.28              | 2.38              | 1.3               | 0.3               |
|                       | -81.3        | -3.4         | -91.5        | -4.9         | -169.6   | -42.7   | -63.2    | 1.44              | 2.22              | 1.0               | 0.4               |
|                       | -73.6        | -18.7        | -91.9        | 1.5          | -57.1    | 176.5   | 56.4     | 1.45              | 3.00              | 1.0               | 0.1               |
|                       | -81.6        | -3.4         | -98.0        | 1.8          | -170.1   | -41.6   | 56.3     | 1.55              | 3.27              | 0.8               | 0.1               |
|                       | -79.1        | -9.5         | -87.8        | -4.9         | -72.1    | 73.9    | -64.2    | 3.01              | 3.79              | 0.1               | 0.0               |
|                       | -79.6        | -10.0        | -95.1        | 2.9          | -70.8    | 74.0    | 56.0     | 3.06              | 4.32              | 0.1               | 0.0               |
|                       | -67.0        | -30.5        | -84.7        | -2.5         | -169.4   | -166.1  | -63.5    | 5.17              | 6.21              | 0.0               | 0.0               |
|                       | -66.4        | -32.3        | -87.2        | 2.1          | -172.8   | -176.3  | 56.5     | 5.19              | 6.33              | 0.0               | 0.0               |
| 2( $\delta, \beta$ )  | -124.1       | 15.6         | -151.7       | 143.5        | -170.8   | -48.3   | -173.5   | 0.47              | 0.28              | 5.2               | 9.8               |
|                       | -122.4       | 16.6         | -150.4       | 141.9        | 59.7     | 81.1    | -173.7   | 0.69              | 0.0 <sup>a)</sup> | 3.6               | 15.8              |
|                       | -107.6       | 0.3          | -151.2       | 141.9        | 56.0     | -177.2  | -173.2   | 0.83              | 0.61              | 2.9               | 5.6               |
|                       | -106.9       | -4.7         | -126.1       | 136.6        | 52.9     | 77.7    | -60.5    | 1.09              | 1.52              | 1.8               | 1.2               |
|                       | -127.7       | 15.4         | -121.1       | 135.9        | -170.8   | -49.0   | -61.4    | 1.49              | 1.48              | 0.9               | 1.3               |
|                       | -125.7       | 15.3         | -152.8       | 162.1        | -171.0   | -47.9   | 59.1     | 1.71              | 1.98              | 0.7               | 0.6               |
|                       | -83.6        | -18.9        | -150.9       | 143.9        | -56.4    | -69.6   | -172.9   | 1.91              | 2.00              | 0.5               | 0.5               |
|                       | -107.9       | -0.4         | -153.1       | 161.6        | 56.9     | -176.4  | 63.9     | 2.07              | 2.57              | 0.4               | 0.2               |
|                       | -124.1       | 17.2         | -150.7       | 160.2        | 61.9     | 81.8    | 63.3     | 2.08              | 1.92              | 0.3               | 0.6               |
|                       | -107.0       | 2.4          | -150.2       | 143.5        | -65.1    | 60.8    | -173.8   | 2.13              | 1.84              | 0.3               | 0.7               |
|                       | -111.4       | 0.3          | -122.5       | 136.0        | 54.3     | 178.4   | -65.6    | 2.26              | 1.66              | 0.3               | 1.0               |
|                       | -82.9        | -18.3        | -151.1       | 143.3        | -58.6    | 177.5   | -173.0   | 2.28              | 2.08              | 0.2               | 0.5               |
|                       | -87.2        | -19.0        | -120.7       | 130.6        | -56.6    | -70.2   | -61.4    | 2.83              | 2.31              | 0.1               | 0.3               |
|                       | -85.4        | -18.3        | -150.1       | 161.8        | -57.4    | -69.5   | 61.7     | 3.14              | 3.34              | 0.1               | 0.1               |
|                       | -109.6       | 2.0          | -119.9       | 133.2        | -65.7    | 62.5    | -61.1    | 3.37              | 3.02              | 0.0               | 0.1               |
|                       | -86.6        | -17.9        | -120.2       | 129.1        | -59.4    | 179.1   | -61.2    | 3.39              | 2.86              | 0.0               | 0.1               |
|                       | -106.3       | 0.0          | -153.0       | 163.3        | -65.2    | 60.0    | 59.9     | 3.42              | 3.88              | 0.0               | 0.0               |
|                       | -84.9        | -17.2        | -150.5       | 161.6        | -59.7    | 178.6   | 61.8     | 3.65              | 3.89              | 0.0               | 0.0               |
|                       | -77.9        | -32.8        | -148.1       | 145.1        | -176.4   | -178.4  | -172.7   | 5.48              | 4.65              | 0.0               | 0.0               |
|                       | -75.3        | -36.3        | -149.7       | 162.1        | 180.0    | 176.3   | 59.6     | 6.63              | 6.75              | 0.0               | 0.0               |
| -82.3                 | -31.7        | -108.5       | 125.3        | -170.5       | -161.5   | -61.6   | 6.67     | 5.51              | 0.0               | 0.0               |                   |
| 2( $\beta, \beta$ )   | -118.6       | 146.8        | -151.0       | 163.4        | -66.7    | 172.8   | 62.4     | 4.45              | 4.29              | 0.0               | 0.0               |
|                       | -118.1       | 144.8        | -118.1       | 139.0        | -67.5    | 172.5   | -63.6    | 4.28              | 3.20              | 0.0               | 0.1               |
|                       | -145.2       | 168.6        | -151.8       | 163.6        | 67.3     | -173.0  | 60.4     | 3.48              | 3.21              | 0.0               | 0.1               |
|                       | -143.9       | 166.3        | -123.7       | 138.7        | 67.1     | -173.4  | -61.8    | 3.40              | 2.73              | 0.0               | 0.2               |
|                       | -113.2       | 138.8        | -152.6       | 147.6        | -67.2    | 171.9   | -172.8   | 3.24              | 2.34              | 0.0               | 0.3               |
|                       | -108.7       | 152.2        | -152.5       | 163.9        | -60.3    | 55.6    | 62.2     | 2.86              | 2.70              | 0.1               | 0.2               |
|                       | -110.5       | 150.4        | -119.3       | 138.9        | -60.1    | 55.7    | -63.6    | 2.74              | 2.13              | 0.1               | 0.4               |
|                       | -115.1       | 102.7        | -151.1       | 163.1        | 55.5     | 52.9    | 66.1     | 2.61              | 2.70              | 0.1               | 0.2               |
|                       | -145.4       | 168.9        | -154.2       | 163.3        | 61.3     | -60.0   | 60.3     | 2.46              | 2.41              | 0.2               | 0.3               |

**Table S5 continued.**

|                    |        |        |        |       |        |        |        |      |      |     |     |
|--------------------|--------|--------|--------|-------|--------|--------|--------|------|------|-----|-----|
|                    | -145.0 | 167.0  | -125.8 | 138.6 | 61.2   | -59.6  | -61.8  | 2.40 | 2.23 | 0.2 | 0.4 |
|                    | -147.5 | 169.5  | -152.6 | 147.0 | 67.2   | -172.1 | -172.7 | 2.35 | 1.77 | 0.2 | 0.8 |
|                    | -165.6 | 163.8  | -154.9 | 163.5 | -79.3  | 38.6   | 60.6   | 1.97 | 2.58 | 0.4 | 0.2 |
|                    | -165.4 | 161.9  | -126.5 | 141.6 | -80.0  | 39.3   | -62.0  | 1.73 | 2.03 | 0.6 | 0.5 |
|                    | -105.9 | 149.4  | -151.5 | 144.0 | -60.3  | 55.2   | -173.6 | 1.61 | 0.76 | 0.8 | 4.4 |
|                    | -146.8 | 170.9  | -153.3 | 146.2 | 61.6   | -60.2  | -172.9 | 1.30 | 1.37 | 1.3 | 1.6 |
|                    | -166.7 | 164.6  | -153.3 | 146.2 | -80.0  | 39.9   | -173.0 | 0.75 | 0.75 | 3.3 | 4.5 |
| $2(\gamma,\beta)$  | -85.4  | 76.5   | -148.3 | 135.2 | 57.7   | 61.1   | -174.3 | 0.21 | 0.72 | 8.1 | 4.7 |
|                    | -87.5  | 69.1   | -126.5 | 137.4 | 59.0   | 62.9   | -66.2  | 1.22 | 1.14 | 1.5 | 2.3 |
|                    | -86.3  | 66.4   | -146.8 | 133.1 | 179.7  | -65.0  | -174.1 | 1.61 | 1.02 | 0.8 | 2.8 |
|                    | -87.3  | 60.7   | -121.9 | 132.6 | -178.1 | -63.6  | -64.6  | 2.49 | 2.54 | 0.2 | 0.2 |
|                    | -89.2  | 75.6   | -146.9 | 131.3 | -57.1  | -67.4  | -174.1 | 3.29 | 2.87 | 0.0 | 0.1 |
|                    | -89.5  | 73.3   | -145.2 | 130.1 | -61.4  | 178.1  | -174.3 | 3.40 | 2.93 | 0.0 | 0.1 |
|                    | -86.9  | 55.5   | -138.8 | 129.1 | 48.0   | -178.5 | -174.3 | 3.67 | 3.08 | 0.0 | 0.1 |
|                    | -88.6  | 67.3   | -124.8 | 136.0 | -64.2  | 55.3   | -64.9  | 4.08 | 3.60 | 0.0 | 0.0 |
|                    | -89.7  | 63.0   | -117.1 | 127.1 | -59.9  | 179.4  | -65.2  | 4.37 | 3.30 | 0.0 | 0.1 |
|                    | -89.4  | 63.9   | -118.4 | 129.7 | -54.5  | -68.0  | -65.2  | 4.41 | 3.96 | 0.0 | 0.0 |
|                    | -87.0  | 48.5   | -105.3 | 126.2 | 49.8   | -179.4 | -65.9  | 4.56 | 4.11 | 0.0 | 0.0 |
| $2(\delta,\gamma)$ | -114.0 | 3.9    | -85.6  | 72.4  | 53.2   | 81.8   | -63.3  | 1.19 | 1.20 | 1.6 | 2.1 |
|                    | -126.0 | 14.6   | -86.4  | 74.1  | -170.2 | -49.9  | -61.1  | 1.32 | 2.06 | 1.2 | 0.5 |
|                    | -112.3 | 2.7    | -84.6  | 72.0  | 55.4   | -178.7 | -63.5  | 1.50 | 1.45 | 0.9 | 1.4 |
|                    | -120.1 | 10.2   | -85.6  | 83.8  | 57.4   | 83.9   | -165.0 | 1.58 | 0.88 | 0.8 | 3.6 |
|                    | -110.9 | -0.3   | -86.2  | 82.7  | 56.0   | -176.8 | -165.4 | 1.58 | 1.28 | 0.8 | 1.8 |
|                    | -126.9 | 14.7   | -87.3  | 86.8  | -170.4 | -49.4  | -167.1 | 1.73 | 1.64 | 0.6 | 1.0 |
|                    | -84.2  | -20.7  | -85.9  | 73.0  | -55.5  | -71.0  | -62.6  | 2.33 | 2.74 | 0.2 | 0.2 |
|                    | -84.4  | -19.6  | -85.9  | 72.8  | -58.8  | 178.1  | -62.6  | 2.73 | 3.05 | 0.1 | 0.1 |
|                    | -109.7 | 3.5    | -85.2  | 72.6  | -66.1  | 63.6   | -60.7  | 2.75 | 2.70 | 0.1 | 0.2 |
|                    | -84.2  | -20.6  | -86.0  | 83.1  | -55.7  | -70.8  | -165.4 | 2.85 | 2.69 | 0.1 | 0.2 |
|                    | -109.2 | -2.1   | -84.6  | 54.2  | 56.3   | -176.7 | 44.3   | 2.97 | 3.96 | 0.1 | 0.0 |
|                    | -114.4 | 2.7    | -84.1  | 54.5  | 55.0   | 84.7   | 44.2   | 2.98 | 3.82 | 0.1 | 0.0 |
|                    | -109.6 | 1.9    | -85.9  | 84.4  | -65.5  | 63.6   | -165.7 | 3.12 | 4.12 | 0.1 | 0.0 |
|                    | -126.5 | 13.4   | -84.4  | 53.8  | -169.7 | -48.9  | 44.4   | 3.24 | 4.25 | 0.0 | 0.0 |
|                    | -88.7  | -15.1  | -85.6  | 81.8  | -59.5  | 179.5  | -165.2 | 3.30 | 3.16 | 0.0 | 0.1 |
|                    | -83.1  | -21.3  | -84.1  | 54.6  | -55.6  | -71.3  | 44.0   | 4.08 | 5.16 | 0.0 | 0.0 |
|                    | -83.7  | -20.0  | -84.2  | 54.7  | -58.7  | 178.6  | 44.0   | 4.54 | 5.56 | 0.0 | 0.0 |
|                    | -108.0 | -1.6   | -84.2  | 55.8  | -65.7  | 62.9   | 43.2   | 4.55 | 5.09 | 0.0 | 0.0 |
|                    | -79.4  | -34.6  | -85.0  | 82.8  | -177.4 | -179.3 | -165.3 | 6.47 | 6.60 | 0.0 | 0.0 |
|                    | -79.1  | -34.7  | -83.6  | 53.4  | -179.9 | 179.3  | 44.5   | 7.53 | 8.33 | 0.0 | 0.0 |
| $2(\gamma,\gamma)$ | -84.2  | 69.5   | -87.8  | 85.2  | 58.4   | 63.8   | -166.4 | 0.64 | 1.24 | 3.9 | 1.9 |
|                    | -89.4  | 60.4   | -87.4  | 75.1  | 60.2   | 66.4   | -70.1  | 1.38 | 2.24 | 1.1 | 0.4 |
|                    | -85.1  | 60.0   | -88.0  | 85.0  | -178.1 | -64.3  | -166.3 | 2.04 | 2.22 | 0.4 | 0.4 |
|                    | -88.4  | 51.9   | -87.5  | 73.9  | -174.6 | -62.5  | -67.9  | 2.55 | 3.56 | 0.2 | 0.0 |
|                    | -84.3  | 48.8   | -85.7  | 83.1  | 49.6   | -177.7 | -165.3 | 3.60 | 4.21 | 0.0 | 0.0 |
|                    | -88.1  | 64.0   | -87.0  | 82.1  | -59.2  | 178.4  | -165.2 | 3.63 | 4.03 | 0.0 | 0.0 |
|                    | -84.2  | 72.5   | -87.0  | 83.6  | -65.8  | 56.8   | -166.2 | 3.66 | 4.29 | 0.0 | 0.0 |
|                    | -87.6  | 64.8   | -87.1  | 82.9  | -54.2  | -68.8  | -165.4 | 3.67 | 4.31 | 0.0 | 0.0 |
|                    | -86.9  | 43.0   | -85.2  | 72.5  | 51.0   | -178.8 | -66.6  | 3.82 | 4.71 | 0.0 | 0.0 |
|                    | -88.1  | 51.5   | -86.2  | 73.0  | -56.8  | 178.4  | -68.7  | 4.06 | 5.25 | 0.0 | 0.0 |
|                    | -87.5  | 50.5   | -86.2  | 73.3  | -51.4  | -70.2  | -68.5  | 4.12 | 5.41 | 0.0 | 0.0 |
| $2(x,\beta)$       | -150.7 | -176.1 | -151.6 | 140.9 | -168.5 | 79.4   | -173.9 | 1.19 | 1.19 | 1.5 | 2.1 |
|                    | -149.3 | -173.2 | -144.9 | 141.6 | -165.3 | -168.8 | -173.7 | 1.40 | 1.43 | 1.1 | 1.4 |
|                    | -149.9 | -176.3 | -102.4 | 129.0 | -165.7 | -165.8 | -63.3  | 2.07 | 1.90 | 0.4 | 0.6 |
|                    | -151.3 | -174.5 | -101.7 | 123.0 | -168.0 | 77.9   | -62.5  | 2.17 | 2.08 | 0.3 | 0.5 |

Table S5 continued.

|                               |        |        |        |       |        |        |        |      |      |     |     |
|-------------------------------|--------|--------|--------|-------|--------|--------|--------|------|------|-----|-----|
|                               | -149.9 | -179.2 | -154.9 | 163.1 | -168.4 | 78.8   | 62.2   | 2.51 | 2.63 | 0.2 | 0.2 |
|                               | -149.6 | -175.1 | -147.7 | 161.7 | -164.8 | -166.0 | 62.7   | 2.75 | 3.20 | 0.1 | 0.1 |
| $2(x,\gamma)$                 | -151.3 | -174.0 | -85.4  | 73.3  | -169.2 | 79.0   | -61.6  | 1.58 | 2.31 | 0.8 | 0.3 |
|                               | -149.8 | -175.9 | -85.4  | 76.0  | -166.9 | -172.2 | -63.7  | 1.80 | 2.42 | 0.6 | 0.3 |
|                               | -150.8 | -175.2 | -85.4  | 86.2  | -169.2 | 79.8   | -166.6 | 1.90 | 2.39 | 0.5 | 0.3 |
|                               | -149.3 | -177.1 | -85.3  | 88.9  | -166.6 | -170.0 | -167.2 | 1.94 | 2.25 | 0.4 | 0.4 |
|                               | -151.3 | -178.2 | -84.7  | 56.0  | -170.3 | 81.2   | 43.1   | 3.50 | 4.89 | 0.0 | 0.0 |
|                               | -148.9 | -177.2 | -83.7  | 55.0  | -166.5 | -169.9 | 44.5   | 3.60 | 4.45 | 0.0 | 0.0 |
| $2(\beta,\gamma)$             | -166.9 | 164.7  | -86.1  | 77.1  | -81.2  | 41.4   | -61.7  | 2.06 | 2.74 | 0.4 | 0.2 |
|                               | -145.6 | 167.8  | -86.8  | 75.4  | 61.0   | -61.3  | -60.2  | 2.56 | 2.82 | 0.2 | 0.1 |
|                               | -145.1 | 166.4  | -88.6  | 89.4  | 61.4   | -61.3  | -167.5 | 2.78 | 2.39 | 0.1 | 0.3 |
|                               | -108.3 | 146.5  | -85.4  | 76.4  | -61.1  | 56.5   | -62.6  | 2.99 | 3.23 | 0.1 | 0.1 |
|                               | -102.9 | 143.2  | -87.0  | 88.4  | -61.5  | 55.5   | -167.2 | 3.02 | 2.95 | 0.1 | 0.1 |
|                               | -166.3 | 164.0  | -84.3  | 53.6  | -80.7  | 40.5   | 43.6   | 3.44 | 4.19 | 0.0 | 0.0 |
|                               | -143.9 | 165.8  | -86.2  | 75.6  | 66.5   | -171.9 | -60.5  | 3.51 | 3.32 | 0.0 | 0.1 |
|                               | -140.7 | 164.2  | -87.0  | 89.1  | 66.4   | -173.3 | -167.3 | 3.72 | 3.23 | 0.0 | 0.1 |
|                               | -144.8 | 167.1  | -85.1  | 53.2  | 60.9   | -62.1  | 43.9   | 4.02 | 4.92 | 0.0 | 0.0 |
|                               | -102.4 | 144.3  | -83.9  | 55.0  | -61.6  | 55.6   | 43.8   | 4.25 | 4.94 | 0.0 | 0.0 |
|                               | -115.2 | 138.4  | -84.8  | 75.6  | -68.0  | 171.2  | -62.5  | 4.39 | 4.13 | 0.0 | 0.0 |
|                               | -101.5 | 128.2  | -86.1  | 86.8  | -67.6  | 174.5  | -166.6 | 4.41 | 3.52 | 0.0 | 0.0 |
|                               | -144.6 | 161.1  | -83.5  | 53.2  | -172.3 | -95.1  | 44.5   | 4.49 | 5.25 | 0.0 | 0.0 |
|                               | -102.4 | 129.3  | -83.6  | 53.7  | -67.5  | 173.9  | 44.5   | 5.65 | 5.98 | 0.0 | 0.0 |
| $2(\rho_{\text{PII}},\beta)$  | -68.7  | 137.9  | -155.1 | 146.5 | -54.0  | -68.7  | -172.5 | 3.15 | 2.22 | 0.1 | 0.4 |
|                               | -66.9  | 142.9  | -150.6 | 162.4 | -53.6  | -69.3  | 64.9   | 4.12 | 4.24 | 0.0 | 0.0 |
|                               | -67.0  | 136.7  | -155.1 | 146.2 | -57.8  | 172.1  | -172.3 | 3.55 | 2.98 | 0.0 | 0.1 |
|                               | -66.7  | 142.4  | -150.2 | 162.5 | -57.7  | 173.3  | 65.2   | 4.53 | 4.95 | 0.0 | 0.0 |
| $2(\delta,\alpha)$            | -78.7  | -7.4   | -75.9  | -21.5 | 55.6   | -179.5 | -170.6 | 3.66 | 4.67 | 0.0 | 0.0 |
|                               | -79.1  | -7.3   | -75.1  | -21.6 | 52.9   | 79.7   | -170.3 | 3.69 | 4.79 | 0.0 | 0.0 |
|                               | -78.6  | -7.8   | -77.5  | -19.8 | 55.7   | -179.3 | -169.7 | 3.70 | 4.78 | 0.0 | 0.0 |
|                               | -72.5  | -19.8  | -75.7  | -18.9 | -54.3  | -74.4  | -168.1 | 3.83 | 4.99 | 0.0 | 0.0 |
|                               | -81.9  | -2.6   | -78.5  | -20.6 | -170.0 | -42.1  | -169.8 | 4.18 | 5.42 | 0.0 | 0.0 |
|                               | -73.8  | -18.0  | -76.1  | -18.6 | -57.3  | 176.7  | -168.3 | 4.25 | 5.57 | 0.0 | 0.0 |
|                               | -80.0  | -7.0   | -74.2  | -22.1 | -71.8  | 72.7   | -170.3 | 5.66 | 6.57 | 0.0 | 0.0 |
|                               | -67.9  | -28.7  | -70.5  | -21.3 | -170.7 | -173.6 | -169.6 | 8.07 | 9.28 | 0.0 | 0.0 |
| $2(\rho_{\text{PII}},\gamma)$ | -82.1  | 162.9  | -84.4  | 53.0  | 61.3   | -172.6 | 44.0   | 5.02 | 5.13 | 0.0 | 0.0 |

<sup>a)</sup> referenced to E = -1242.316206 hartree and G = -1242.381459 hartree



**Table S6.** Characteristic geometries parameters, relative zero-point corrected and Gibbs Free Energies ( $\Delta E_{ZPC}$  and  $\Delta G_{298K}$  in kcal/mol), and Boltzmann weights of 10 conformers of each important conformer family of  $2 \cdot (\text{DMSO})_1$  sorted by  $\Delta E_{ZPC}$ . Color coding of the table cells refers either to secondary structure family ( $\phi/\psi$ ) or  $t/g+/g-$  ( $\alpha/\beta/\gamma$ ).

|                                                                                  | $\phi_{\text{Ser}}$ | $\psi_{\text{Ser}}$ | $\phi_{\text{Phe}}$ | $\psi_{\text{Phe}}$ | $\alpha$ | $\beta$ | $\gamma$ | Solvated H | $\Delta E_{ZPC}$ | $\Delta G_{298K}$ | pop( $\Delta E$ ) | pop( $\Delta G$ ) |
|----------------------------------------------------------------------------------|---------------------|---------------------|---------------------|---------------------|----------|---------|----------|------------|------------------|-------------------|-------------------|-------------------|
| $2(\delta, \delta) \cdot (\text{DMSO})_1$                                        | -71.6               | -20.3               | -84.0               | -6.6                | -65.8    | 82.8    | -64.4    | OH/BocNH   | 0.00             | 1.50              | 15.3              | 1.9               |
|                                                                                  | -74.9               | -13.2               | -83.9               | -7.8                | 62.7     | -80.0   | -65.0    | OH/BocNH   | 0.04             | 2.13              | 14.3              | 0.6               |
|                                                                                  | -74.6               | -14.7               | -89.8               | -1.8                | 64.3     | -79.7   | 57.2     | OH/BocNH   | 0.22             | 2.19              | 10.6              | 0.6               |
|                                                                                  | -72.4               | -20.3               | -88.0               | -1.8                | -65.3    | 80.8    | 56.9     | OH/BocNH   | 0.57             | 3.16              | 5.8               | 0.1               |
|                                                                                  | -77.3               | -10.3               | -85.3               | -7.8                | 55.7     | -168.5  | -65.5    | OH         | 0.63             | 0.00              | 5.3               | 23.6              |
|                                                                                  | -70.9               | -22.7               | -85.8               | -5.6                | -52.5    | -75.1   | -64.8    | OH         | 0.70             | 1.50              | 4.7               | 1.9               |
|                                                                                  | -71.6               | -21.4               | -84.9               | -6.5                | -56.8    | 164.5   | -64.6    | OH         | 0.86             | 1.19              | 3.6               | 3.1               |
|                                                                                  | -71.1               | -23.0               | -87.5               | -2.7                | -52.5    | -76.6   | 57.0     | OH         | 1.03             | 2.03              | 2.7               | 0.8               |
|                                                                                  | -77.0               | -11.9               | -91.6               | -1.6                | 56.3     | -175.1  | 56.9     | OH         | 1.10             | 1.82              | 2.4               | 1.1               |
|                                                                                  | -71.7               | -22.1               | -88.6               | -2.1                | -56.6    | 169.0   | 57.3     | OH         | 1.30             | 1.98              | 1.7               | 0.8               |
| $2(\delta, \beta) \cdot (\text{DMSO})_1$                                         | -83.1               | -20.0               | -146.4              | 136.2               | -62.8    | 84.4    | -174.5   | OH/BocNH   | 1.31             | 1.27              | 1.7               | 2.8               |
|                                                                                  | -83.9               | -21.2               | -125.3              | 140.1               | -62.5    | 82.6    | -64.8    | OH/BocNH   | 1.57             | 2.10              | 1.1               | 0.7               |
|                                                                                  | -104.4              | -3.4                | -151.9              | 161.0               | 56.5     | -169.8  | 65.2     | OH         | 1.83             | 0.92              | 0.7               | 5.0               |
|                                                                                  | -87.8               | -13.6               | -152.0              | 159.5               | 64.4     | -80.6   | 66.5     | OH/BocNH   | 1.83             | 2.68              | 0.7               | 0.3               |
|                                                                                  | -80.7               | -22.6               | -146.9              | 137.8               | -54.1    | -73.1   | -174.7   | OH         | 1.92             | 1.20              | 0.6               | 3.1               |
|                                                                                  | -82.9               | -20.8               | -148.5              | 161.2               | -63.1    | 84.4    | 64.5     | OH/BocNH   | 1.97             | 2.21              | 0.6               | 0.6               |
|                                                                                  | -125.0              | 13.1                | -125.4              | 136.3               | -170.7   | -47.4   | -63.7    | NPrH       | 2.04             | 2.89              | 0.5               | 0.2               |
|                                                                                  | -124.8              | 15.6                | -139.7              | 126.1               | -170.7   | -48.3   | -175.9   | NPrH       | 2.15             | 2.59              | 0.4               | 0.3               |
|                                                                                  | -81.8               | -21.1               | -146.7              | 137.6               | -58.2    | 170.4   | -174.7   | OH         | 2.21             | 1.29              | 0.4               | 2.7               |
|                                                                                  | -81.2               | -24.1               | -123.5              | 140.7               | -54.4    | -77.2   | -64.3    | OH         | 2.23             | 1.46              | 0.4               | 2.0               |
| $2(\beta, \beta) \cdot (\text{DMSO})_1$<br>& $2(x, \beta) \cdot (\text{DMSO})_1$ | -148.9              | -173.0              | -144.2              | 133.5               | -170.0   | 78.0    | -175.0   | OH         | 1.46             | 1.61              | 1.3               | 1.5               |
|                                                                                  | -147.4              | -174.3              | -120.1              | 139.7               | -166.0   | -164.0  | -64.1    | OH         | 1.62             | 1.68              | 1.0               | 1.4               |
|                                                                                  | -148.2              | -172.2              | -130.3              | 130.3               | -166.0   | -164.9  | -175.8   | OH         | 1.72             | 1.48              | 0.8               | 1.9               |
|                                                                                  | -147.9              | -174.1              | -111.0              | 123.7               | -165.7   | -161.0  | -175.4   | OH         | 1.76             | 1.70              | 0.8               | 1.3               |
|                                                                                  | -148.0              | -178.4              | -152.6              | 160.3               | -169.7   | 86.2    | 63.3     | OH         | 2.18             | 3.25              | 0.4               | 0.1               |
|                                                                                  | -148.1              | -174.4              | -148.7              | 160.4               | -165.0   | -161.1  | 63.6     | OH         | 2.38             | 2.84              | 0.3               | 0.2               |
|                                                                                  | -144.7              | 167.4               | -150.8              | 142.1               | 66.6     | -171.7  | -174.1   | OH         | 2.72             | 0.89              | 0.2               | 5.2               |
|                                                                                  | -165.3              | 163.8               | -141.3              | 126.4               | -78.5    | 37.9    | -176.7   | NPrH       | 2.89             | 3.69              | 0.1               | 0.0               |
|                                                                                  | -164.9              | 163.8               | -153.1              | 162.0               | -78.1    | 37.2    | 63.3     | NPrH       | 2.97             | 2.86              | 0.1               | 0.2               |
|                                                                                  | -147.8              | 167.2               | -152.0              | 143.2               | 65.9     | -88.2   | -174.4   | OH         | 2.98             | 2.34              | 0.1               | 0.5               |
| $2(\delta, \gamma) \cdot (\text{DMSO})_1$                                        | -92.8               | -9.3                | -84.6               | 72.5                | 64.8     | -77.0   | -65.9    | OH/BocNH   | 1.43             | 2.25              | 1.4               | 0.5               |
|                                                                                  | -107.5              | -1.3                | -85.1               | 71.7                | 55.9     | -172.1  | -63.8    | OH         | 1.67             | 1.02              | 0.9               | 4.2               |
|                                                                                  | -82.9               | -20.5               | -85.6               | 71.6                | -63.7    | 83.6    | -64.3    | OH/BocNH   | 1.76             | 2.42              | 0.8               | 0.4               |
|                                                                                  | -105.8              | -2.7                | -86.1               | 84.1                | 56.0     | -169.7  | -167.1   | OH         | 2.03             | 1.45              | 0.5               | 2.0               |
|                                                                                  | -82.6               | -21.4               | -86.1               | 83.9                | -63.4    | 84.1    | -167.2   | OH/BocNH   | 2.24             | 2.65              | 0.3               | 0.3               |
|                                                                                  | -83.2               | -21.1               | -86.2               | 83.9                | -63.1    | 84.6    | -167.2   | OH/BocNH   | 2.27             | 2.39              | 0.3               | 0.4               |
|                                                                                  | -103.8              | -5.5                | -85.8               | 82.8                | 49.5     | 91.2    | -166.8   | OH         | 2.32             | 1.89              | 0.3               | 1.0               |
|                                                                                  | -81.3               | -22.3               | -85.3               | 71.7                | -54.3    | -73.2   | -64.2    | OH         | 2.44             | 1.89              | 0.2               | 1.0               |
|                                                                                  | -110.9              | 2.9                 | -83.1               | 72.2                | 51.8     | 101.1   | -64.5    | OH         | 2.56             | 2.78              | 0.2               | 0.2               |
|                                                                                  | -81.8               | -21.8               | -85.6               | 72.6                | -58.9    | 167.1   | -64.2    | OH         | 2.77             | 2.78              | 0.1               | 0.2               |

<sup>a)</sup> referenced to  $E = -1795.507076$  hartree and  $G = -1795.58426$  hartree

**Table S7.** Characteristic geometries parameters, relative zero-point corrected and Gibbs Free Energies ( $\Delta E_{ZPC}$  and  $\Delta G_{298K}$  in kcal/mol), and Boltzmann weights of 10 conformers of each important conformer family of **2**·(DMSO)<sub>2</sub> sorted by  $\Delta E_{ZPC}$ . Color coding of the table cells refers either to secondary structure family ( $\phi/\psi$ ) or  $t/g+/g-$  ( $\alpha/\beta/\gamma$ ).

|                                                   | $\phi_{Ser}$ | $\psi_{Ser}$ | $\phi_{Phe}$ | $\psi_{Phe}$ | $\alpha$ | $\beta$ | $\gamma$ | Solvated H      | $\Delta E_{ZPC}$  | $\Delta G_{298K}$ | pop( $\Delta E$ ) | pop( $\Delta G$ ) |
|---------------------------------------------------|--------------|--------------|--------------|--------------|----------|---------|----------|-----------------|-------------------|-------------------|-------------------|-------------------|
| <b>2</b> ( $\delta,\beta$ )·(DMSO) <sub>2</sub>   | -94.3        | -8.9         | -139.7       | 124.9        | 66.4     | -74.3   | -175.4   | OH/BocNH + NPrH | 0.0 <sup>a)</sup> | 1.30              | 12.0              | 2.4               |
|                                                   | -100.5       | -5.6         | -119.8       | 134.0        | 66.4     | -71.1   | -66.4    | OH/BocNH + NPrH | 0.09              | 2.49              | 10.4              | 0.3               |
|                                                   | -84.1        | -18.8        | -136.6       | 125.1        | -62.7    | 84.6    | -175.7   | OH/BocNH + NPrH | 0.15              | 1.04              | 9.3               | 3.7               |
|                                                   | -103.8       | -3.7         | -152.4       | 160.6        | 56.6     | -168.5  | 65.7     | OH + NPrH       | 0.44              | 0.04              | 5.7               | 19.8              |
|                                                   | -103.7       | -2.8         | -138.1       | 125.1        | 55.9     | -165.2  | -175.5   | OH + NPrH       | 0.52              | 1.15              | 4.9               | 3.0               |
|                                                   | -84.3        | -20.7        | -120.7       | 134.6        | -62.1    | 83.0    | -63.8    | OH/BocNH + NPrH | 0.55              | 1.93              | 4.8               | 0.8               |
|                                                   | -81.9        | -21.1        | -149.3       | 161.0        | -63.6    | 84.0    | 64.1     | OH/BocNH + NPrH | 0.73              | 1.14              | 3.5               | 3.1               |
|                                                   | -80.3        | -23.4        | -139.5       | 125.8        | -53.8    | -73.6   | -175.7   | OH + NPrH       | 0.83              | 1.17              | 2.9               | 2.9               |
|                                                   | -88.0        | -14.3        | -153.3       | 160.9        | 64.5     | -78.8   | 66.1     | OH/BocNH + NPrH | 0.86              | 2.35              | 2.8               | 0.4               |
|                                                   | -108.6       | -0.7         | -110.7       | 129.6        | 55.4     | -166.5  | -64.4    | OH + BocNH      | 0.86              | 1.56              | 2.8               | 1.5               |
| <b>2</b> ( $\beta,\beta$ )·(DMSO) <sub>2</sub>    | -149.4       | -174.2       | -120.5       | 131.3        | -169.7   | 77.4    | -63.6    | OH + NPrH       | 0.41              | 1.53              | 6.0               | 1.6               |
| & <b>2</b> ( $\alpha,\beta$ )·(DMSO) <sub>2</sub> | -148.2       | -174.5       | -111.4       | 130.2        | -166.1   | -164.3  | -64.0    | OH + NPrH       | 0.76              | 2.62              | 3.3               | 0.3               |
|                                                   | -148.6       | -179.1       | -153.5       | 160.3        | -169.3   | 85.7    | 63.1     | OH + NPrH       | 0.81              | 1.45              | 3.0               | 1.8               |
|                                                   | -148.0       | -175.2       | -128.5       | 121.9        | -170.3   | 86.0    | -175.6   | OH + NPrH       | 0.87              | 2.38              | 2.8               | 0.4               |
|                                                   | -147.7       | -174.3       | -150.2       | 161.1        | -165.1   | -164.2  | 63.7     | OH + NPrH       | 1.00              | 0.0 <sup>a)</sup> | 2.2               | 21.2              |
|                                                   | -148.6       | -173.8       | -115.9       | 122.6        | -166.1   | -163.7  | -175.8   | OH + NPrH       | 1.08              | 3.24              | 1.9               | 0.1               |
|                                                   | -120.0       | 145.4        | -141.4       | 126.1        | -62.4    | -77.9   | -175.843 | OH + NPrH       | 1.88              | 1.02              | 0.5               | 3.8               |
|                                                   | -143.8       | 166.5        | -153.7       | 162.3        | 66.3     | -175.6  | 62.9     | OH + NPrH       | 1.94              | 0.75              | 0.5               | 5.9               |
|                                                   | -122.0       | 146.6        | -127.3       | 140.8        | -62.0    | -77.2   | -63.7    | OH + NPrH       | 2.02              | 1.20              | 0.4               | 2.8               |
|                                                   | -146.8       | 167.0        | -152.9       | 161.6        | 66.2     | -89.3   | 63.0     | OH + NPrH       | 2.05              | 2.08              | 0.4               | 0.6               |
| <b>2</b> ( $\delta,\delta$ )·(DMSO) <sub>2</sub>  | -73.9        | -14.3        | -81.2        | -9.9         | 64.5     | 166.6   | -65.3    | OH + BocNH      | 1.29              | 3.37              | 1.4               | 0.1               |
|                                                   | -73.4        | -16.9        | -84.4        | -6.3         | -65.5    | -164.1  | -65.2    | OH + BocNH      | 1.50              | 3.30              | 0.9               | 0.1               |
|                                                   | -73.5        | -18.0        | -86.6        | -2.9         | -63.1    | -78.4   | 57.8     | OH + BocNH      | 1.53              | 3.59              | 0.9               | 0.0               |
|                                                   | -73.1        | -16.3        | -87.8        | -3.1         | 62.7     | 104.5   | 57.8     | OH + BocNH      | 1.59              | 4.18              | 0.8               | 0.0               |
|                                                   | -73.4        | -16.9        | -83.9        | -6.7         | -65.7    | -84.2   | -65.2    | OH + BocNH      | 1.67              | 3.26              | 0.7               | 0.1               |
|                                                   | -72.7        | -15.8        | -70.9        | -24.3        | 63.4     | 105.2   | -170.7   | OH + BocNH      | 2.88              | 5.88              | 0.1               | 0.0               |
|                                                   | -73.5        | -16.6        | -70.9        | -23.4        | -65.1    | -76.0   | -169.6   | OH + BocNH      | 3.06              | 6.87              | 0.1               | 0.0               |
|                                                   | -63.8        | -32.8        | -78.3        | -8.4         | -175.3   | 177.6   | -64.5    | OH + BocNH      | 3.11              | 4.38              | 0.1               | 0.0               |
|                                                   | -77.3        | -10.0        | -88.0        | -3.4         | -77.1    | 75.4    | 58.8     | OH + BocNH      | 3.18              | 5.74              | 0.1               | 0.0               |
|                                                   | -74.2        | -13.0        | -68.3        | -26.6        | 66.4     | 127.5   | -172.1   | OH + BocNH      | 3.33              | 6.21              | 0.0               | 0.0               |

<sup>a)</sup> referenced to E = -2348.685285 hartree and G = -2348.777157 hartree

**Table S8.** Characteristic geometries parameters, relative zero-point corrected and Gibbs Free Energies ( $\Delta E_{ZPC}$  and  $\Delta G_{298K}$  in kcal/mol), and Boltzmann weights of 10 conformers of each important conformer family of  $2\cdot\cdot(\text{DMSO})_3$  sorted by  $\Delta E_{ZPC}$ . Color coding of the table cells refers either to secondary structure family ( $\phi/\psi$ ) or  $t/g+/g-$  ( $\alpha/\beta/\gamma$ ).

|                                           | $\phi_{\text{Ser}}$                        | $\psi_{\text{Ser}}$ | $\phi_{\text{Phe}}$ | $\psi_{\text{Phe}}$ | $\alpha$ | $\beta$ | $\gamma$                | Solvated H        | $\Delta E_{ZPC}$        | $\Delta G_{298K}$ | pop( $\Delta E$ ) | pop( $\Delta G$ ) |
|-------------------------------------------|--------------------------------------------|---------------------|---------------------|---------------------|----------|---------|-------------------------|-------------------|-------------------------|-------------------|-------------------|-------------------|
| $2(\beta,\beta)\cdot\cdot(\text{DMSO})_3$ | -141.5                                     | 164.3               | -117.4              | 130.9               | 67.4     | -87.9   | -64.5                   | OH + PheNH + NPrH | 0.05                    | 0.10              | 13.3              | 14.7              |
| $\& 2(x,\beta)\cdot\cdot(\text{DMSO})_3$  | -121.5                                     | 146.4               | -115.8              | 132.4               | -66.2    | 168.9   | -64.8                   | OH + PheNH + NPrH | 0.45                    | 0.0 <sup>a)</sup> | 6.8               | 17.5              |
|                                           | -144.6                                     | 163.0               | -121.6              | 118.6               | 65.1     | -176.1  | -174.9                  | OH + PheNH + NPrH | 0.50                    | 1.95              | 6.2               | 0.6               |
|                                           | -116.3                                     | -160.8              | -145.5              | 126.6               | -169.6   | 68.9    | -175.7                  | OH + BocNH + NPrH | 0.73                    | 1.34              | 4.2               | 1.8               |
|                                           | -146.1                                     | 163.0               | -106.9              | 120.4               | 65.6     | -85.4   | -174.6                  | OH + PheNH + NPrH | 0.95                    | 1.33              | 2.9               | 1.9               |
|                                           | -120.6                                     | 147.1               | -137.2              | 118.1               | -65.7    | 171.2   | -174.8                  | OH + PheNH + NPrH | 0.96                    | 0.71              | 2.9               | 5.3               |
|                                           | -116.7                                     | -163.1              | -150.5              | 159.3               | -168.8   | 70.8    | 64.1                    | OH + BocNH + NPrH | 1.15                    | 1.17              | 2.1               | 2.4               |
|                                           | -99.5                                      | -164.5              | -123.8              | 138.7               | -166.6   | -174.1  | -63.2                   | OH + BocNH + NPrH | 1.56                    | 0.66              | 1.0               | 5.8               |
|                                           | -98.3                                      | 137.2               | -145.6              | 128.4               | -66.9    | 175.6   | -175.7                  | OH + BocNH + NPrH | 1.62                    | 0.58              | 0.9               | 6.6               |
|                                           | -98.0                                      | -167.4              | -152.1              | 159.8               | -165.4   | -171.1  | 63.8                    | OH + BocNH + NPrH | 1.97                    | 1.83              | 0.5               | 0.8               |
|                                           | $2(\delta,\beta)\cdot\cdot(\text{DMSO})_3$ | -91.5               | -35.2               | -135.4              | 120.8    | -68.8   | 89.6                    | -175.1            | OH + PheNH/BocNH + NPrH | 0.07              | 0.40              | 13.0              |
| -77.4                                     | -35.9                                      | -121.1              | 139.0               | -173.6              | 175.2    | -64.7   | OH + PheNH/BocNH + NPrH | 2.31              | 1.71                    | 0.3               | 1.0               |                   |
| -108.6                                    | -15.8                                      | -134.0              | 118.9               | 63.7                | -174.9   | -174.5  | OH + BocNH + NPrH       | 0.0 <sup>a)</sup> | 1.13                    | 14.6              | 2.6               |                   |
| -123.1                                    | -15.5                                      | -134.5              | 117.5               | 61.1                | 129.1    | -174.0  | OH + BocNH + NPrH       | 0.90              | 2.99                    | 3.2               | 0.1               |                   |
| -107.0                                    | -2.9                                       | -127.0              | 139.2               | -69.7               | 86.3     | -64.9   | OH + BocNH + NPrH       | 0.51              | 0.68                    | 6.1               | 5.6               |                   |
| -99.7                                     | -8.5                                       | -121.3              | 134.5               | -67.5               | 158.6    | -65.0   | OH + PheNH/BocNH + NPrH | 0.51              | 0.31                    | 6.1               | 10.4              |                   |
| -91.8                                     | -13.2                                      | -148.4              | 160.7               | -63.2               | -73.3    | 64.4    | OH + BocNH + NPrH       | 0.85              | 0.41                    | 3.4               | 8.7               |                   |
| -88.9                                     | -11.4                                      | -151.5              | 160.6               | 69.1                | -178.0   | 67.3    | OH + BocNH + NPrH       | 1.42              | 2.16                    | 1.3               | 0.5               |                   |
| -94.7                                     | -17.1                                      | -155.5              | 162.6               | -72.3               | 84.7     | 64.1    | OH + BocNH + NPrH       | 1.35              | 4.98                    | 1.5               | 0.0               |                   |
| -97.4                                     | -1.7                                       | -144.4              | 159.4               | 64.5                | 111.0    | 67.8    | OH + BocNH + NPrH       | 1.77              | 3.62                    | 0.7               | 0.0               |                   |

<sup>a)</sup> referenced to E = -2901.861463 hartree and G = -2901.966563 hartree

**Table S9.** Characteristic geometries parameters, relative zero-point corrected and Gibbs Free Energies ( $\Delta E_{ZPC}$  and  $\Delta G_{298K}$  in kcal/mol), and Boltzmann weights of the optimized conformers of  $2\cdot\cdot(\text{DMSO})_4$  sorted by  $\Delta E_{ZPC}$ . Color coding of the table cells refers either to secondary structure family ( $\phi/\psi$ ) or  $t/g+/g-$  ( $\alpha/\beta/\gamma$ ).

|                                           | $\phi_{\text{Ser}}$                                       | $\psi_{\text{Ser}}$ | $\phi_{\text{Phe}}$ | $\psi_{\text{Phe}}$ | $\alpha$ | $\beta$ | $\gamma$ | $\Delta E_{ZPC}$  | $\Delta G_{298K}$ | pop( $\Delta E$ ) | pop( $\Delta G$ ) |
|-------------------------------------------|-----------------------------------------------------------|---------------------|---------------------|---------------------|----------|---------|----------|-------------------|-------------------|-------------------|-------------------|
| $2(\beta,\beta)\cdot\cdot(\text{DMSO})_4$ | -89.0                                                     | 147.0               | -107.8              | 129.9               | -65.7    | 162.9   | -65.8    | 0.0 <sup>a)</sup> | 1.14              | 35.3              | 9.5               |
|                                           | -84.3                                                     | 161.1               | -123.7              | 116.8               | 66.5     | 172.6   | -174.6   | 1.04              | 2.97              | 6.0               | 0.4               |
|                                           | -99.1                                                     | 159.8               | -150.1              | 157.3               | 65.3     | 170.0   | 63.7     | 2.57              | 3.48              | 0.5               | 0.2               |
|                                           | -77.4                                                     | 147.0               | -136.7              | 117.3               | -66.3    | 164.8   | -174.1   | 0.06              | 0.0 <sup>a)</sup> | 31.9              | 65.2              |
|                                           | -110.3                                                    | 139.7               | -112.7              | 134.2               | -67.6    | 86.6    | -64.8    | 0.63              | 0.78              | 12.1              | 17.4              |
|                                           | -100.1                                                    | 145.3               | -141.0              | 119.3               | -67.8    | 86.7    | -174.2   | 0.60              | 1.44              | 12.9              | 5.7               |
|                                           | $2(\text{pp}_{\text{II}},\beta)\cdot\cdot(\text{DMSO})_4$ | -75.8               | 141.9               | -146.7              | 158.8    | -62.8   | -95.5    | 65.4              | 2.10              | 2.73              | 1.0               |
| -74.0                                     | 145.1                                                     | -146.8              | 157.9               | -64.8               | 178.7    | 64.5    | 2.78     | 2.54              | 0.3               | 0.9               |                   |

<sup>a)</sup> referenced to E = -3455.037501 hartree and G = -3455.156565 hartree

### 3. Selected Cartesian coordinate

**1( $\gamma'$ ) == 1\_c1a**

|   |             |             |             |
|---|-------------|-------------|-------------|
| C | 1.68885100  | -0.68461800 | 0.66796300  |
| H | 1.51476300  | -0.42491200 | 1.71701500  |
| C | 2.43796400  | 0.48704800  | -0.00987500 |
| O | 3.40134100  | 0.29733000  | -0.76178700 |
| N | 1.95836700  | 1.70870900  | 0.27734300  |
| H | 1.10000000  | 1.75406400  | 0.81694800  |
| C | 2.48181900  | 2.91793200  | -0.34099700 |
| H | 1.99967500  | 3.78049400  | 0.12092400  |
| H | 2.28754000  | 2.93237800  | -1.41893900 |
| H | 3.56140200  | 2.98676000  | -0.18555400 |
| N | 0.39352700  | -0.91201800 | 0.04358200  |
| H | 0.34494200  | -1.57450700 | -0.71817500 |
| C | -0.71337100 | -0.19582500 | 0.36714700  |
| O | -0.71524200 | 0.71009900  | 1.19558700  |
| O | -1.77286800 | -0.62690500 | -0.33677500 |
| C | -3.11288900 | -0.01134000 | -0.20026600 |
| C | -3.94571500 | -0.81960900 | -1.19646500 |
| H | -3.54851900 | -0.71347800 | -2.21038800 |
| H | -4.97950600 | -0.46213400 | -1.19019700 |
| H | -3.94468600 | -1.88098800 | -0.93097600 |
| C | -3.63461100 | -0.20694900 | 1.22468800  |
| H | -4.67522200 | 0.12968900  | 1.27530400  |
| H | -3.04931100 | 0.36273700  | 1.94749100  |
| H | -3.60750400 | -1.26619500 | 1.49953900  |
| C | -3.05955300 | 1.46173000  | -0.61068300 |
| H | -2.47664200 | 2.05413700  | 0.09553800  |
| H | -4.07814900 | 1.86179000  | -0.64293400 |
| H | -2.62362600 | 1.56523100  | -1.60952000 |
| C | 2.52002500  | -1.96821400 | 0.61260200  |
| H | 1.98847600  | -2.76440400 | 1.14039200  |
| H | 3.47760200  | -1.79489500 | 1.11883600  |
| O | 2.71962900  | -2.41828900 | -0.72145200 |
| H | 3.20749500  | -1.70140800 | -1.16104600 |

**1( $\delta$ ) == 1\_c4b**

|   |             |             |             |
|---|-------------|-------------|-------------|
| C | -1.53118700 | -0.63133300 | -0.10137500 |
| H | -1.34170200 | -0.85367700 | -1.15616400 |
| C | -2.67906900 | 0.39170900  | -0.06923600 |
| O | -3.85108400 | 0.01946700  | -0.21673500 |
| N | -2.34568100 | 1.67890800  | 0.10358600  |
| H | -1.36507600 | 1.89842900  | 0.20018500  |
| C | -3.32850700 | 2.75233200  | 0.08698200  |
| H | -2.82350100 | 3.68928200  | 0.32463900  |
| H | -4.10978900 | 2.56723700  | 0.82884400  |
| H | -3.80010700 | 2.83801500  | -0.89695200 |
| N | -0.29135100 | -0.11276100 | 0.44911400  |
| H | -0.20428000 | -0.06075200 | 1.45581900  |
| C | 0.89227100  | -0.17812500 | -0.24861300 |
| O | 0.97017800  | -0.42374500 | -1.43837300 |
| O | 1.91409600  | 0.09888000  | 0.58044900  |
| C | 3.31625200  | 0.15456400  | 0.10302600  |
| C | 4.08308300  | 0.49742600  | 1.38094200  |
| H | 3.75087600  | 1.45712200  | 1.78820500  |
| H | 5.15268500  | 0.56593300  | 1.16268300  |
| H | 3.93441400  | -0.27500800 | 2.14146800  |
| C | 3.74180900  | -1.21427800 | -0.43162000 |
| H | 4.81434700  | -1.19490000 | -0.65051400 |
| H | 3.20548200  | -1.47344600 | -1.34511800 |
| H | 3.56368700  | -1.99075000 | 0.31916900  |
| C | 3.47051700  | 1.26627200  | -0.93658100 |
| H | 2.92986000  | 1.03474100  | -1.85511700 |
| H | 4.53154400  | 1.38598700  | -1.17837400 |
| H | 3.10567400  | 2.21803500  | -0.53701200 |

|   |             |             |             |
|---|-------------|-------------|-------------|
| C | -1.94409300 | -1.94428500 | 0.60099600  |
| H | -2.16320100 | -1.73761200 | 1.66117700  |
| H | -1.09645300 | -2.63409600 | 0.56056800  |
| O | -3.03867900 | -2.57977100 | -0.03049200 |
| H | -3.70779500 | -1.88190600 | -0.15832600 |

**1( $\beta$ ) == 1\_c9a**

|   |             |             |             |
|---|-------------|-------------|-------------|
| C | -1.42439500 | -0.34155100 | -0.09947500 |
| H | -1.32405800 | -0.63559600 | -1.15264600 |
| C | -2.49049900 | 0.76882400  | -0.01204700 |
| O | -2.19143600 | 1.91946900  | 0.31238100  |
| N | -3.74271300 | 0.39034800  | -0.32289300 |
| H | -3.90891700 | -0.60000200 | -0.45868500 |
| C | -4.87011100 | 1.30771900  | -0.25094500 |
| H | -5.75770700 | 0.79485400  | -0.62410100 |
| H | -4.68319900 | 2.19079100  | -0.86743400 |
| H | -5.05290800 | 1.63826200  | 0.77711400  |
| N | -0.17354300 | 0.21072300  | 0.37229100  |
| H | -0.22069000 | 1.16735800  | 0.70408700  |
| C | 1.02108200  | -0.25854600 | -0.08719000 |
| O | 1.14294100  | -1.27991700 | -0.74748000 |
| O | 2.01840800  | 0.55449200  | 0.31217100  |
| C | 3.43405900  | 0.26585400  | 0.00206900  |
| C | 4.16135700  | 1.43450600  | 0.66970500  |
| H | 3.83030100  | 2.38836400  | 0.24816200  |
| H | 5.23949400  | 1.34050500  | 0.50976800  |
| H | 3.97032400  | 1.44514700  | 1.74700700  |
| C | 3.85284000  | -1.06235600 | 0.63700000  |
| H | 4.93369500  | -1.19205800 | 0.51938400  |
| H | 3.34813500  | -1.90756000 | 0.16754700  |
| H | 3.62657100  | -1.06205400 | 1.70814900  |
| C | 3.65517000  | 0.28790100  | -1.51230000 |
| H | 3.14293500  | -0.54044800 | -2.00314200 |
| H | 4.72715600  | 0.20902900  | -1.72116500 |
| H | 3.29573600  | 1.23079800  | -1.93686900 |
| C | -1.80562200 | -1.60658500 | 0.70434700  |
| H | -2.13257900 | -1.33157000 | 1.71089300  |
| H | -0.92052400 | -2.24314200 | 0.78722100  |
| O | -2.88939600 | -2.32283900 | 0.10579900  |
| H | -2.54739100 | -2.84440700 | -0.63102600 |

**1( $\delta$ )-(DMSO)<sub>1</sub> == 1\_c5c.(DMSO)<sub>1</sub>**

|   |             |             |             |
|---|-------------|-------------|-------------|
| C | 1.64666200  | -1.01295300 | 1.02620100  |
| H | 2.15316000  | -0.49786500 | 1.84848700  |
| C | 2.77331500  | -1.50460800 | 0.09837200  |
| O | 3.71448700  | -2.15203600 | 0.56783600  |
| N | 2.66886000  | -1.20097800 | -1.20435700 |
| H | 1.86768500  | -0.66217200 | -1.49834200 |
| C | 3.66107600  | -1.60301000 | -2.18811900 |
| H | 3.34964300  | -1.23526900 | -3.16636400 |
| H | 3.75136000  | -2.69276300 | -2.22887700 |
| H | 4.64269800  | -1.18421200 | -1.94589600 |
| N | 0.72108000  | -0.07801900 | 0.40746000  |
| H | -0.20007000 | -0.40147700 | 0.12054600  |
| C | 0.92651300  | 1.26869600  | 0.47201200  |
| O | 1.94202900  | 1.78582400  | 0.91546800  |
| O | -0.13916000 | 1.92205600  | -0.03220100 |
| C | -0.17444800 | 3.39710400  | -0.14418700 |
| C | -1.54252900 | 3.64590000  | -0.78184400 |
| H | -1.61024600 | 3.15627800  | -1.75802300 |
| H | -1.69521200 | 4.71987100  | -0.92218900 |
| H | -2.34380100 | 3.26358300  | -0.14239700 |
| C | -0.10607300 | 4.03238200  | 1.24636500  |
| H | -0.27587800 | 5.11030900  | 1.15745200  |
| H | 0.86608400  | 3.87090300  | 1.71353000  |
| H | -0.88586700 | 3.61903800  | 1.89408800  |

|          |             |             |             |
|----------|-------------|-------------|-------------|
| C        | 0.94469000  | 3.88232200  | -1.06827700 |
| H        | 1.92873100  | 3.71921800  | -0.62720800 |
| H        | 0.81852200  | 4.95415900  | -1.25200500 |
| H        | 0.89558300  | 3.36553600  | -2.03213100 |
| C        | 0.90563400  | -2.21929500 | 1.63151200  |
| H        | 0.16707600  | -1.84693800 | 2.35363500  |
| H        | 1.63768800  | -2.82493400 | 2.16999600  |
| O        | 0.29867400  | -3.06184800 | 0.66624800  |
| H        | -0.50498600 | -2.62208300 | 0.31384300  |
| O        | -1.77722200 | -1.58184000 | -0.37294100 |
| S        | -3.22819400 | -1.80779400 | 0.09594700  |
| C        | -3.83131300 | -0.18352700 | 0.63261200  |
| C        | -4.20071400 | -1.96385200 | -1.42682100 |
| H(Iso=2) | -3.27525500 | 0.07722500  | 1.53423800  |
| H(Iso=2) | -4.89607800 | -0.27209400 | 0.86102100  |
| H(Iso=2) | -3.65326300 | 0.54500000  | -0.16085700 |
| H(Iso=2) | -3.99394400 | -1.10739200 | -2.07197900 |
| H(Iso=2) | -3.89136400 | -2.89537500 | -1.90314300 |
| H(Iso=2) | -5.25808700 | -2.01306200 | -1.15653600 |

**1( $\beta$ )-(DMSO)<sub>1</sub> == 1\_c9c.(DMSO)<sub>1</sub>**

|          |             |             |             |
|----------|-------------|-------------|-------------|
| C        | 0.46939400  | 1.21341100  | -0.26964200 |
| H        | 0.58850700  | 1.17936300  | -1.35996300 |
| C        | 0.33404500  | 2.69169600  | 0.14882100  |
| O        | 1.21467000  | 3.25535700  | 0.80790500  |
| N        | -0.78581900 | 3.30330800  | -0.26445800 |
| H        | -1.49568000 | 2.71579500  | -0.69193500 |
| C        | -1.08795000 | 4.68727600  | 0.06668800  |
| H        | -2.01356100 | 4.96846000  | -0.43710200 |
| H        | -0.28484500 | 5.34720200  | -0.27251900 |
| H        | -1.21406800 | 4.82320100  | 1.14622400  |
| N        | 1.65667900  | 0.68282300  | 0.36711300  |
| H        | 2.12080400  | 1.31669300  | 1.00711700  |
| C        | 2.40679400  | -0.29090000 | -0.21967700 |
| O        | 2.05082200  | -0.93644900 | -1.19548000 |
| O        | 3.56956400  | -0.43753000 | 0.44687100  |
| C        | 4.56536000  | -1.46536500 | 0.07406100  |
| C        | 5.66657300  | -1.24780400 | 1.11349500  |
| H        | 6.07303800  | -0.23444300 | 1.04115800  |
| H        | 6.48003200  | -1.95955300 | 0.94560200  |
| H        | 5.27910700  | -1.39738300 | 2.12583700  |
| C        | 3.95885800  | -2.86302100 | 0.21780400  |
| H        | 4.74480500  | -3.61167800 | 0.07512200  |
| H        | 3.17489300  | -3.03793200 | -0.52005500 |
| H        | 3.54115000  | -2.99734900 | 1.22078400  |
| C        | 5.09641400  | -1.19742100 | -1.33601700 |
| H        | 4.32585800  | -1.35650200 | -2.09128500 |
| H        | 5.93099100  | -1.87589700 | -1.54043000 |
| H        | 5.46724700  | -0.17049600 | -1.41593400 |
| C        | -0.77390900 | 0.37193700  | 0.07825600  |
| H        | -1.05562700 | 0.53769100  | 1.12727200  |
| H        | -0.50822300 | -0.68472100 | -0.04507200 |
| O        | -1.83075200 | 0.73375300  | -0.80090700 |
| H        | -2.67994500 | 0.36621300  | -0.45560300 |
| O        | -4.19518300 | -0.18386700 | 0.15537400  |
| S        | -4.54154000 | -1.66401300 | -0.07911400 |
| C        | -5.06754700 | -2.30141400 | 1.53673700  |
| C        | -6.15935600 | -1.66400400 | -0.90154300 |
| H(Iso=2) | -4.18295200 | -2.30730900 | 2.17543500  |
| H(Iso=2) | -5.44133800 | -3.31938300 | 1.40356100  |
| H(Iso=2) | -5.83875800 | -1.64463200 | 1.94499600  |
| H(Iso=2) | -6.85794900 | -1.06098100 | -0.31750800 |
| H(Iso=2) | -6.00756400 | -1.23389700 | -1.89274900 |
| H(Iso=2) | -6.50231100 | -2.69763700 | -0.98971900 |

**1( $\delta$ )-(DMSO)<sub>2</sub> == 1\_c5c.(DMSO)<sub>2</sub>**

|   |             |             |             |
|---|-------------|-------------|-------------|
| C | -0.31483600 | -0.14685100 | -0.36153100 |
| H | 0.66646800  | 0.01250000  | 0.08959800  |

|          |             |             |             |
|----------|-------------|-------------|-------------|
| C        | -1.29587000 | -0.22833200 | 0.82650600  |
| O        | -1.17346100 | 0.57423600  | 1.76032400  |
| N        | -2.24878900 | -1.17256900 | 0.79439600  |
| H        | -2.39640000 | -1.71260000 | -0.05734300 |
| C        | -3.24176700 | -1.28868800 | 1.85098000  |
| H        | -3.86793200 | -2.15772600 | 1.64338400  |
| H        | -3.87625100 | -0.39699400 | 1.90700800  |
| H        | -2.75708300 | -1.42477700 | 2.82178200  |
| N        | -0.21928500 | -1.34888100 | -1.16653200 |
| H        | -1.02295700 | -1.64963200 | -1.71107400 |
| C        | 0.81021900  | -2.22604000 | -1.02270600 |
| O        | 1.77615900  | -2.05205000 | -0.29069700 |
| O        | 0.61322100  | -3.29888600 | -1.81868200 |
| C        | 1.58210400  | -4.41180100 | -1.88882300 |
| C        | 0.92695800  | -5.35583600 | -2.89928900 |
| H        | -0.05373300 | -5.68525300 | -2.54287300 |
| H        | 1.55684500  | -6.23834000 | -3.04422500 |
| H        | 0.79863100  | -4.85984900 | -3.86621300 |
| C        | 2.92702300  | -3.90932700 | -2.41954500 |
| H        | 3.58493900  | -4.76562300 | -2.60017800 |
| H        | 3.41339400  | -3.24044500 | -1.70860100 |
| H        | 2.78976700  | -3.38151400 | -3.36888700 |
| C        | 1.70699100  | -5.09158600 | -0.52305300 |
| H        | 2.17811700  | -4.43494100 | 0.20926900  |
| H        | 2.31653800  | -5.99532000 | -0.62534000 |
| H        | 0.72044600  | -5.38848100 | -0.15269600 |
| C        | -0.62604600 | 1.08176800  | -1.22192400 |
| H        | 0.17468000  | 1.19176800  | -1.96630200 |
| H        | -0.62376700 | 1.96757200  | -0.57391900 |
| O        | -1.88599700 | 0.91005800  | -1.85204000 |
| H        | -2.10278600 | 1.72768000  | -2.35456300 |
| O        | -2.53335400 | 3.13459200  | -3.32531600 |
| S        | -2.91460900 | 4.41835400  | -2.57159200 |
| C        | -2.16032300 | 5.77699000  | -3.50991900 |
| C        | -4.65047600 | 4.74337500  | -2.99368400 |
| H(Iso=2) | -1.08004300 | 5.68011800  | -3.39124200 |
| H(Iso=2) | -2.50181600 | 6.72318000  | -3.08352100 |
| H(Iso=2) | -2.44642000 | 5.68789300  | -4.56025700 |
| H(Iso=2) | -4.76396100 | 4.72478700  | -4.07981000 |
| H(Iso=2) | -5.24079100 | 3.95316700  | -2.52709400 |
| H(Iso=2) | -4.93116500 | 5.71524900  | -2.58061700 |
| O        | -2.89581000 | -2.52716900 | -1.79050500 |
| S        | -4.08924500 | -1.84393000 | -2.47848800 |
| C        | -3.47361000 | -1.27418400 | -4.08762800 |
| C        | -5.14833100 | -3.19740900 | -3.06412000 |
| H(Iso=2) | -2.75242600 | -0.48498800 | -3.86974300 |
| H(Iso=2) | -4.31548700 | -0.87562100 | -4.65901800 |
| H(Iso=2) | -3.00194300 | -2.11135700 | -4.60700600 |
| H(Iso=2) | -4.54647400 | -3.89420600 | -3.65161000 |
| H(Iso=2) | -5.55505300 | -3.68675900 | -2.17766800 |
| H(Iso=2) | -5.95781100 | -2.77019300 | -3.66097500 |

**1( $\beta$ )-(DMSO)<sub>2</sub> == 1\_c13b.(DMSO)<sub>2</sub>**

|   |             |             |             |
|---|-------------|-------------|-------------|
| C | 0.01342700  | -0.23238800 | -0.30152200 |
| H | 0.95040100  | 0.02038300  | -0.80676300 |
| C | 0.30595400  | -0.38317200 | 1.20917200  |
| O | -0.22150800 | -1.26611700 | 1.89155000  |
| N | 1.15314100  | 0.52938100  | 1.71408600  |
| H | 1.61727000  | 1.19360100  | 1.09074000  |
| C | 1.50454700  | 0.55396200  | 3.12481800  |
| H | 2.19558900  | 1.38120400  | 3.29421700  |
| H | 1.98783500  | -0.38004000 | 3.43080600  |
| H | 0.61757000  | 0.70012800  | 3.74949000  |
| N | -0.48512400 | -1.46043000 | -0.88376000 |
| H | -1.47508500 | -1.67740400 | -0.78584400 |
| C | 0.35512900  | -2.48509800 | -1.18235000 |
| O | 1.57689600  | -2.41108700 | -1.14626700 |
| O | -0.35640000 | -3.57463100 | -1.54661300 |

|          |             |             |             |
|----------|-------------|-------------|-------------|
| C        | 0.29379400  | -4.82856500 | -1.97698500 |
| C        | -0.90235200 | -5.73025200 | -2.28954300 |
| H        | -1.52407000 | -5.87101500 | -1.40017600 |
| H        | -0.55040100 | -6.71041600 | -2.62429000 |
| H        | -1.51937100 | -5.29499700 | -3.08155200 |
| C        | 1.12647800  | -4.58722900 | -3.23858300 |
| H        | 1.48174800  | -5.54822100 | -3.62462800 |
| H        | 1.99040000  | -3.95403700 | -3.03311500 |
| H        | 0.51544400  | -4.11545600 | -4.01495000 |
| C        | 1.12199600  | -5.41522100 | -0.83113700 |
| H        | 1.98175800  | -4.78656500 | -0.59665000 |
| H        | 1.48285100  | -6.40798100 | -1.11924300 |
| H        | 0.50628400  | -5.52591500 | 0.06729400  |
| C        | -0.96105100 | 0.93339500  | -0.56736800 |
| H        | -1.17788900 | 0.95321800  | -1.64442000 |
| H        | -0.46145200 | 1.86944800  | -0.30649500 |
| O        | -2.15630000 | 0.89477600  | 0.19444600  |
| H        | -2.68381600 | 0.10666000  | -0.05182600 |
| O        | 2.69941300  | 2.33094400  | 0.03592000  |
| S        | 2.27510000  | 3.72484000  | -0.44087800 |
| C        | 3.33359900  | 4.90271600  | 0.44977400  |
| C        | 3.00426100  | 3.92360100  | -2.09245000 |
| H(Iso=2) | 3.04126700  | 4.85636500  | 1.50007000  |
| H(Iso=2) | 3.14996100  | 5.90416900  | 0.05325000  |
| H(Iso=2) | 4.37842600  | 4.61037500  | 0.32355200  |
| H(Iso=2) | 4.07167000  | 3.69757900  | -2.04082000 |
| H(Iso=2) | 2.48996600  | 3.22104800  | -2.75008000 |
| H(Iso=2) | 2.83044900  | 4.94865400  | -2.42824600 |
| O        | -3.45757400 | -1.47321100 | -0.50542000 |
| S        | -4.11975500 | -2.45186100 | 0.48520600  |
| C        | -3.69856500 | -1.85637900 | 2.14715100  |
| C        | -5.88311800 | -2.02522300 | 0.48234800  |
| H(Iso=2) | -2.61034600 | -1.90453100 | 2.22634800  |
| H(Iso=2) | -4.16984500 | -2.52368500 | 2.87282700  |
| H(Iso=2) | -4.05109000 | -0.82974900 | 2.26757000  |
| H(Iso=2) | -5.99137700 | -0.95379700 | 0.66371500  |
| H(Iso=2) | -6.27350700 | -2.29678100 | -0.49958700 |
| H(Iso=2) | -6.37902000 | -2.61197300 | 1.25933100  |

**1( $\beta$ )-(DMSO)<sub>3</sub> == 1\_c12a.(DMSO)<sub>3</sub>**

|   |             |             |             |
|---|-------------|-------------|-------------|
| C | -0.08880000 | 0.35676200  | -0.15587700 |
| H | 0.99464300  | 0.45407000  | -0.06866400 |
| C | -0.72665700 | 0.47471800  | 1.24058600  |
| O | -1.86930000 | 0.05568200  | 1.46325300  |
| N | 0.01974300  | 1.09974900  | 2.16516400  |
| H | 0.97168700  | 1.39779200  | 1.93655500  |
| C | -0.47583500 | 1.35700700  | 3.50785900  |
| H | 0.28677600  | 1.91129700  | 4.05709300  |
| H | -0.68694900 | 0.42297900  | 4.03932500  |
| H | -1.39575800 | 1.94972000  | 3.48070700  |
| N | -0.36432300 | -0.93011500 | -0.76241000 |
| H | -1.32590700 | -1.15162100 | -1.02959100 |
| C | 0.54167800  | -1.93995600 | -0.73248500 |
| O | 1.68600200  | -1.84294300 | -0.30428300 |
| O | 0.00122900  | -3.06217800 | -1.26089900 |
| C | 0.75809500  | -4.32466000 | -1.35888200 |
| C | -0.25861300 | -5.27049900 | -2.00252900 |
| H | -1.14810900 | -5.36965400 | -1.37299200 |
| H | 0.18614200  | -6.26161900 | -2.13125000 |
| H | -0.56588900 | -4.89894500 | -2.98476500 |
| C | 1.97482600  | -4.14759100 | -2.27118900 |
| H | 2.43774900  | -5.12402500 | -2.44798500 |
| H | 2.71691400  | -3.48568000 | -1.82353500 |
| H | 1.66968400  | -3.73714900 | -3.23916500 |
| C | 1.14090700  | -4.82354700 | 0.03709900  |
| H | 1.87132600  | -4.16657900 | 0.51066700  |
| H | 1.57348900  | -5.82612100 | -0.04442500 |
| H | 0.25384200  | -4.88836300 | 0.67555400  |



|          |             |             |             |
|----------|-------------|-------------|-------------|
| C        | -0.59669600 | 1.51399800  | -1.04223300 |
| H        | -0.48870800 | 2.44763500  | -0.47866800 |
| H        | -1.66368800 | 1.37318800  | -1.25578600 |
| O        | 0.15014800  | 1.64026200  | -2.23670600 |
| H        | -0.30971100 | 1.18023200  | -2.97358100 |
| O        | -3.20390100 | -1.45066400 | -1.60105600 |
| S        | -4.10538000 | -1.94980100 | -0.46597500 |
| C        | -4.95904600 | -0.48471800 | 0.18441300  |
| C        | -5.52708600 | -2.73765800 | -1.27949500 |
| H(Iso=2) | -4.18741400 | 0.11704700  | 0.66649300  |
| H(Iso=2) | -5.70234900 | -0.81167700 | 0.91604400  |
| H(Iso=2) | -5.42741400 | 0.05207500  | -0.64379900 |
| H(Iso=2) | -5.95904900 | -2.04051200 | -2.00104500 |
| H(Iso=2) | -5.15016000 | -3.63060500 | -1.78087700 |
| H(Iso=2) | -6.25507200 | -3.01739000 | -0.51417900 |
| O        | -1.13693500 | 0.63111200  | -4.42599800 |
| S        | -0.94422300 | -0.81945200 | -4.89600300 |
| C        | -2.61137700 | -1.52876000 | -4.98776100 |
| C        | -0.59833100 | -0.71090800 | -6.67508900 |
| H(Iso=2) | -2.97820900 | -1.58187100 | -3.96001200 |
| H(Iso=2) | -2.53740100 | -2.52997700 | -5.41958000 |
| H(Iso=2) | -3.24083000 | -0.87900000 | -5.60033500 |
| H(Iso=2) | -1.37303800 | -0.10739300 | -7.15330500 |
| H(Iso=2) | 0.38051300  | -0.23982900 | -6.77842500 |
| H(Iso=2) | -0.57288000 | -1.72289100 | -7.08636200 |
| O        | 2.69245200  | 2.09343100  | 1.63570200  |
| S        | 3.91446500  | 1.26166000  | 2.04433800  |
| C        | 5.08973600  | 1.39793500  | 0.66606800  |
| C        | 4.81977400  | 2.27069900  | 3.25387200  |
| H(Iso=2) | 4.64469800  | 0.87072000  | -0.17917800 |
| H(Iso=2) | 6.02578200  | 0.91600400  | 0.95844200  |
| H(Iso=2) | 5.24234400  | 2.45333000  | 0.42962000  |
| H(Iso=2) | 5.76194400  | 1.77013000  | 3.48953600  |
| H(Iso=2) | 4.19364500  | 2.32913300  | 4.14568000  |
| H(Iso=2) | 4.99134800  | 3.26418300  | 2.83354100  |

## 2( $\beta$ ,ppm)

|   |             |             |             |
|---|-------------|-------------|-------------|
| C | -5.62117800 | 0.56049700  | -0.50512600 |
| C | -5.53269900 | 2.05281900  | -0.17575300 |
| H | -6.54112000 | 2.47947800  | -0.16309800 |
| H | -5.07086200 | 2.22050700  | 0.79783000  |
| H | -4.95199900 | 2.57864100  | -0.94055200 |
| C | -6.28056900 | 0.34920100  | -1.86952400 |
| H | -5.73184500 | 0.88278300  | -2.65154000 |
| H | -6.30692100 | -0.71403600 | -2.12667300 |
| H | -7.30740700 | 0.72600800  | -1.84826700 |
| C | -6.35455400 | -0.23627300 | 0.57666600  |
| H | -6.35323600 | -1.30338900 | 0.33203100  |
| H | -5.89638600 | -0.09635600 | 1.55649900  |
| H | -7.39589300 | 0.09840500  | 0.62735600  |
| O | -4.26961600 | 0.00434400  | -0.71677400 |
| C | -3.34655600 | -0.01780600 | 0.26771200  |
| O | -3.48652100 | 0.42780100  | 1.39657600  |
| N | -2.21423900 | -0.62557800 | -0.17768100 |
| C | -1.00545800 | -0.68874000 | 0.61017200  |
| H | -0.97837400 | 0.15783900  | 1.30206100  |
| H | -2.13777500 | -0.87482900 | -1.15493300 |
| C | 0.19656200  | -0.65030400 | -0.33021600 |
| O | 0.11181500  | -0.98970900 | -1.50817800 |
| N | 1.36408000  | -0.28393100 | 0.25620500  |
| C | 2.64524000  | -0.60671900 | -0.34018700 |
| H | 2.59836200  | -0.33732500 | -1.39845600 |
| C | 2.91073100  | -2.12490400 | -0.22063900 |
| O | 2.41641100  | -2.80055000 | 0.68721100  |
| N | 3.74365500  | -2.64831900 | -1.13432200 |
| C | 4.12087700  | -4.05630200 | -1.13636500 |
| H | 4.88839400  | -4.20880600 | -1.89593000 |
| H | 4.51971600  | -4.34209900 | -0.16018700 |

|   |             |             |             |
|---|-------------|-------------|-------------|
| H | 3.26012700  | -4.69376900 | -1.36113400 |
| H | 1.34287800  | -0.16081100 | 1.26043400  |
| H | 4.05139500  | -2.06835000 | -1.90050600 |
| C | -0.96151400 | -2.00316400 | 1.44769200  |
| H | -1.85062300 | -2.01006900 | 2.08340800  |
| H | -1.02016900 | -2.85988000 | 0.76351600  |
| O | 0.16794500  | -2.09107600 | 2.29526700  |
| H | 0.94039700  | -2.39036100 | 1.77564400  |
| C | 3.78218800  | 0.18775700  | 0.34700000  |
| H | 3.81086800  | -0.08502800 | 1.40818600  |
| H | 4.73027000  | -0.14597100 | -0.08722400 |
| C | 3.64822600  | 1.68851000  | 0.19817500  |
| C | 3.25240200  | 2.48724700  | 1.27666300  |
| C | 3.92380500  | 2.30922300  | -1.02759100 |
| C | 3.12618400  | 3.87098300  | 1.13519700  |
| H | 3.04666600  | 2.02681300  | 2.23898700  |
| C | 3.79860400  | 3.69029000  | -1.17439200 |
| H | 4.24412100  | 1.70860800  | -1.87492300 |
| C | 3.39711200  | 4.47654200  | -0.09180800 |
| H | 2.81842100  | 4.47269300  | 1.98454900  |
| H | 4.01876900  | 4.15276900  | -2.13145300 |
| H | 3.30106600  | 5.55170300  | -0.20391200 |

**2( $\beta$ , $\beta$ )**

|   |             |             |             |
|---|-------------|-------------|-------------|
| C | -6.02371500 | -1.20299700 | -0.05169200 |
| C | -6.32229400 | -1.15507400 | -1.55156600 |
| H | -7.37599800 | -1.40342400 | -1.71542600 |
| H | -6.12914800 | -0.16563400 | -1.96748000 |
| H | -5.71360000 | -1.89147500 | -2.08594400 |
| C | -6.30343800 | -2.59765300 | 0.51049900  |
| H | -5.71784000 | -3.35397200 | -0.02063900 |
| H | -6.05137600 | -2.64504000 | 1.57409700  |
| H | -7.36449200 | -2.83701800 | 0.39470000  |
| C | -6.79014900 | -0.13895200 | 0.73649500  |
| H | -6.50544100 | -0.16594300 | 1.79318300  |
| H | -6.60762500 | 0.86226800  | 0.34434400  |
| H | -7.86275400 | -0.34783500 | 0.66965200  |
| O | -4.56721800 | -1.05770200 | 0.17944800  |
| C | -3.90277100 | 0.06568500  | -0.13227300 |
| O | -4.38160700 | 1.03975000  | -0.71277500 |
| N | -2.61825400 | -0.01164100 | 0.28416300  |
| C | -1.58432300 | 0.95066500  | -0.05624400 |
| H | -1.58441000 | 1.13015400  | -1.13891500 |
| H | -2.30362800 | -0.84030000 | 0.77451500  |
| C | -0.24273700 | 0.30254400  | 0.33368200  |
| O | -0.19515300 | -0.67154200 | 1.08456000  |
| N | 0.85224900  | 0.88590200  | -0.18903100 |
| C | 2.20638400  | 0.44502500  | 0.10455300  |
| H | 2.23261300  | 0.09525900  | 1.13950800  |
| C | 3.11611500  | 1.66784500  | -0.07703500 |
| O | 2.86764700  | 2.50685100  | -0.94437900 |
| N | 4.17776200  | 1.74787300  | 0.74375500  |
| C | 5.17888300  | 2.79904400  | 0.62429100  |
| H | 5.84312600  | 2.74514600  | 1.48754000  |
| H | 5.76871000  | 2.68459300  | -0.29114000 |
| H | 4.69392500  | 3.77760100  | 0.60459000  |
| H | 0.77669400  | 1.66978400  | -0.82685200 |
| H | 4.34242400  | 0.99682700  | 1.39694100  |
| C | -1.76466000 | 2.32137900  | 0.64267900  |
| H | -2.02880300 | 2.13902200  | 1.69465100  |
| H | -0.82075300 | 2.87368400  | 0.61998200  |
| O | -2.72563800 | 3.13914300  | 0.00064900  |
| H | -3.46799500 | 2.56548800  | -0.27425700 |
| C | 2.62841400  | -0.72160700 | -0.83672300 |
| H | 1.83488300  | -1.47220200 | -0.76976600 |
| H | 2.63996400  | -0.34483400 | -1.86438100 |
| C | 3.95912900  | -1.34990600 | -0.48885900 |
| C | 4.07304800  | -2.20701000 | 0.61536700  |

|   |            |             |             |
|---|------------|-------------|-------------|
| C | 5.10292000 | -1.09319500 | -1.25477500 |
| C | 5.29852600 | -2.78425400 | 0.94983200  |
| H | 3.19272500 | -2.43319100 | 1.21117700  |
| C | 6.33053400 | -1.67168800 | -0.92592000 |
| H | 5.03154300 | -0.43868900 | -2.11895900 |
| C | 6.43277000 | -2.51718500 | 0.17965900  |
| H | 5.36531700 | -3.44902700 | 1.80546000  |
| H | 7.20416600 | -1.46410300 | -1.53593500 |
| H | 7.38540000 | -2.97005900 | 0.43528700  |

**2( $\delta,\delta$ )**

|   |             |             |             |
|---|-------------|-------------|-------------|
| C | -4.44500100 | -0.67214500 | -0.91678000 |
| C | -4.16750700 | 0.71797200  | -1.49086800 |
| H | -5.09666200 | 1.13003800  | -1.89734900 |
| H | -3.79286900 | 1.40005200  | -0.72694000 |
| H | -3.43983400 | 0.65835600  | -2.30654200 |
| C | -4.97897200 | -1.60924100 | -2.00075100 |
| H | -4.28070600 | -1.66942400 | -2.84092800 |
| H | -5.13229600 | -2.61617400 | -1.60141200 |
| H | -5.93691700 | -1.23525300 | -2.37334700 |
| C | -5.39231200 | -0.63582500 | 0.28373700  |
| H | -5.52306100 | -1.64034200 | 0.69840500  |
| H | -5.02257300 | 0.02672000  | 1.06719500  |
| H | -6.37240400 | -0.27480900 | -0.04420800 |
| O | -3.17037700 | -1.32713500 | -0.53357400 |
| C | -2.36123800 | -0.82266100 | 0.41037900  |
| O | -2.54973900 | 0.19335200  | 1.06618300  |
| N | -1.24268300 | -1.59503900 | 0.53576000  |
| C | -0.32435000 | -1.44612500 | 1.65053300  |
| H | -0.88503000 | -1.32221800 | 2.58334100  |
| H | -1.16986800 | -2.42491500 | -0.03643600 |
| C | 0.58357200  | -0.20631500 | 1.57652800  |
| O | 1.19729300  | 0.15504700  | 2.57525700  |
| N | 0.65546900  | 0.41391400  | 0.37696400  |
| C | 1.44234600  | 1.60714300  | 0.12819700  |
| H | 2.11495400  | 1.71790100  | 0.98393700  |
| C | 0.60474700  | 2.90407700  | 0.09419200  |
| O | 1.14616600  | 3.97206600  | -0.19343500 |
| N | -0.70072700 | 2.80614500  | 0.40846300  |
| C | -1.55309500 | 3.98299600  | 0.48329800  |
| H | -2.56261600 | 3.66305700  | 0.74428000  |
| H | -1.19101100 | 4.68252900  | 1.24352200  |
| H | -1.57792500 | 4.50551000  | -0.47736600 |
| H | 0.13505200  | 0.00194200  | -0.38586600 |
| H | -1.08989100 | 1.91241400  | 0.68328200  |
| C | 0.52286200  | -2.72344500 | 1.78928200  |
| H | 1.25095700  | -2.57549400 | 2.59246200  |
| H | -0.13338700 | -3.55430800 | 2.06161000  |
| O | 1.14984800  | -3.10757600 | 0.57045700  |
| H | 1.90471700  | -2.53066700 | 0.39082200  |
| C | 2.28368500  | 1.46334400  | -1.16054500 |
| H | 1.61182000  | 1.28221400  | -2.00846800 |
| H | 2.76588900  | 2.42801900  | -1.33562900 |
| C | 3.31454800  | 0.36003800  | -1.06922500 |
| C | 3.11021900  | -0.87838200 | -1.69071800 |
| C | 4.49752600  | 0.55202100  | -0.34233800 |
| C | 4.05523900  | -1.90265300 | -1.58209300 |
| H | 2.21005500  | -1.04228500 | -2.27697000 |
| C | 5.44413100  | -0.46634000 | -0.23082000 |
| H | 4.68036500  | 1.50881600  | 0.13931900  |
| C | 5.22493000  | -1.69986700 | -0.84840600 |
| H | 3.87914900  | -2.85289500 | -2.07673600 |
| H | 6.35447400  | -0.29530700 | 0.33516000  |
| H | 5.96168500  | -2.49223000 | -0.76415800 |

**2( $\gamma,\beta$ )**

|   |            |             |             |
|---|------------|-------------|-------------|
| C | 4.17511300 | -2.17991600 | -0.20188200 |
| C | 2.92572600 | -3.05818100 | -0.10888400 |

|   |             |             |             |
|---|-------------|-------------|-------------|
| H | 3.23021200  | -4.10085600 | 0.02845900  |
| H | 2.29291100  | -2.76816600 | 0.73064000  |
| H | 2.34384200  | -2.99484500 | -1.03401400 |
| C | 5.05005200  | -2.60744000 | -1.38134600 |
| H | 4.48386400  | -2.57265000 | -2.31697300 |
| H | 5.92059900  | -1.95146000 | -1.47614300 |
| H | 5.40317300  | -3.63137200 | -1.22816600 |
| C | 4.98464200  | -2.17041700 | 1.09650200  |
| H | 5.83673300  | -1.48846300 | 1.01096200  |
| H | 4.37248900  | -1.86992400 | 1.94760700  |
| H | 5.37338900  | -3.17656100 | 1.28438900  |
| O | 3.79834500  | -0.79685600 | -0.57351100 |
| C | 3.00748100  | -0.04021800 | 0.20657500  |
| O | 2.52417100  | -0.36785400 | 1.28361900  |
| N | 2.80810100  | 1.17748900  | -0.36384400 |
| C | 2.01418800  | 2.21618900  | 0.27254100  |
| H | 2.15023000  | 2.12659900  | 1.35467900  |
| H | 3.16849300  | 1.35488200  | -1.29109100 |
| C | 0.51282900  | 2.04011300  | -0.05120300 |
| O | -0.05946600 | 2.75249900  | -0.88429700 |
| N | -0.10470900 | 1.05958700  | 0.63376200  |
| C | -1.49631900 | 0.69549000  | 0.41331900  |
| H | -2.01735600 | 1.59309400  | 0.07370300  |
| C | -2.06274600 | 0.21122200  | 1.75415700  |
| O | -1.42470900 | -0.56978800 | 2.45909100  |
| N | -3.27980400 | 0.67944400  | 2.09007100  |
| C | -3.97446500 | 0.24699700  | 3.29441900  |
| H | -4.89744700 | 0.82051100  | 3.38736500  |
| H | -4.21715500 | -0.81944100 | 3.24862500  |
| H | -3.35253700 | 0.42272100  | 4.17589800  |
| H | 0.44906900  | 0.46290900  | 1.24332500  |
| H | -3.76004400 | 1.29153100  | 1.44857600  |
| C | 2.50930000  | 3.59417700  | -0.17374600 |
| H | 1.91677300  | 4.36767800  | 0.33045200  |
| H | 3.55506000  | 3.71170400  | 0.12173200  |
| O | 2.45947400  | 3.74993500  | -1.58650600 |
| H | 1.52142400  | 3.65181000  | -1.82130200 |
| C | -1.62063500 | -0.40614400 | -0.67674700 |
| H | -1.07767100 | -0.04059000 | -1.55422500 |
| H | -1.10397100 | -1.30116600 | -0.31687200 |
| C | -3.04752900 | -0.73618600 | -1.05361300 |
| C | -3.77647900 | 0.11602500  | -1.89540600 |
| C | -3.67408800 | -1.89103100 | -0.56910500 |
| C | -5.09765900 | -0.17392600 | -2.23762600 |
| H | -3.30201800 | 1.00886400  | -2.29416700 |
| C | -4.99556400 | -2.18620300 | -0.91049300 |
| H | -3.12174200 | -2.56708300 | 0.07746700  |
| C | -5.71255300 | -1.32703700 | -1.74435100 |
| H | -5.64347700 | 0.49564900  | -2.89515600 |
| H | -5.46160200 | -3.08898500 | -0.52795500 |
| H | -6.73864500 | -1.55658500 | -2.01357300 |

**2( $\delta,\beta$ )**

|   |            |             |             |
|---|------------|-------------|-------------|
| C | 5.13145800 | -1.43812600 | -0.49318800 |
| C | 4.66926300 | -2.50514300 | 0.50099300  |
| H | 5.45900800 | -3.25476800 | 0.61480100  |
| H | 4.45527100 | -2.07552200 | 1.48035700  |
| H | 3.77237000 | -3.01125000 | 0.13010700  |
| C | 5.43065200 | -2.06278000 | -1.85672700 |
| H | 4.55546100 | -2.59624700 | -2.23952600 |
| H | 5.71597000 | -1.29426200 | -2.58147000 |
| H | 6.25644600 | -2.77419400 | -1.76406600 |
| C | 6.33569400 | -0.64208900 | 0.01369100  |
| H | 6.60051400 | 0.14634900  | -0.69815500 |
| H | 6.13689600 | -0.19049600 | 0.98626800  |
| H | 7.19492600 | -1.31382000 | 0.10978800  |
| O | 4.01208500 | -0.51865200 | -0.80479100 |
| C | 3.42085500 | 0.22666200  | 0.14506400  |

|   |             |             |             |
|---|-------------|-------------|-------------|
| O | 3.73456100  | 0.28677400  | 1.32018800  |
| N | 2.36664800  | 0.91430600  | -0.40642600 |
| C | 1.68517000  | 1.97577400  | 0.30796600  |
| H | 2.08480600  | 1.97987100  | 1.32694800  |
| H | 2.29841400  | 0.88724300  | -1.41509900 |
| C | 0.17010000  | 1.74588200  | 0.43945400  |
| O | -0.57247800 | 2.67697700  | 0.77996800  |
| N | -0.28010400 | 0.50625100  | 0.19284800  |
| C | -1.67200300 | 0.11477600  | 0.33984900  |
| H | -2.10352300 | 0.69947000  | 1.15631300  |
| C | -1.67832800 | -1.38216900 | 0.67780400  |
| O | -0.86315900 | -2.14366300 | 0.15507000  |
| N | -2.61856600 | -1.79383400 | 1.54609800  |
| C | -2.80085200 | -3.19742300 | 1.88936400  |
| H | -3.54027900 | -3.26610900 | 2.68795400  |
| H | -3.14953100 | -3.77388800 | 1.02643300  |
| H | -1.85772200 | -3.62731000 | 2.23541500  |
| H | 0.37442100  | -0.21832700 | -0.07771500 |
| H | -3.27653900 | -1.11907500 | 1.90555100  |
| C | 1.97726000  | 3.35448200  | -0.32689000 |
| H | 3.06153600  | 3.46634300  | -0.41339500 |
| H | 1.55013000  | 3.38954100  | -1.34208900 |
| O | 1.50146000  | 4.42903000  | 0.46124500  |
| H | 0.58333200  | 4.19820500  | 0.69377000  |
| C | -2.47008200 | 0.40114700  | -0.96593800 |
| H | -2.27736900 | 1.44768500  | -1.22131400 |
| H | -2.04898600 | -0.21717300 | -1.76509200 |
| C | -3.95921900 | 0.16764500  | -0.84586100 |
| C | -4.77284200 | 1.09671000  | -0.18145400 |
| C | -4.55839300 | -0.97539100 | -1.38939000 |
| C | -6.14622400 | 0.88461900  | -0.05620100 |
| H | -4.32892900 | 1.99849100  | 0.23182200  |
| C | -5.93289400 | -1.19008100 | -1.26921700 |
| H | -3.94503200 | -1.70184800 | -1.91515700 |
| C | -6.73102300 | -0.26156700 | -0.59950500 |
| H | -6.75998800 | 1.61806400  | 0.45743000  |
| H | -6.37872500 | -2.08019400 | -1.70213000 |
| H | -7.80002900 | -0.42513600 | -0.50770100 |

**2( $\delta,\delta$ )-(DMSO)<sub>1</sub>**

|   |             |             |             |
|---|-------------|-------------|-------------|
| C | -2.51482000 | 2.97529000  | -1.22405000 |
| C | -1.31104000 | 3.51505000  | -1.99804000 |
| H | -1.62214900 | 4.38993000  | -2.57774000 |
| H | -0.50297000 | 3.81385000  | -1.32929000 |
| H | -0.93604000 | 2.76137000  | -2.69772000 |
| C | -3.63865000 | 2.57897000  | -2.18256000 |
| H | -3.28523000 | 1.84478000  | -2.91270000 |
| H | -4.48241000 | 2.14940000  | -1.63434000 |
| H | -3.99100000 | 3.46238000  | -2.72265000 |
| C | -3.02657000 | 3.95709000  | -0.16841000 |
| H | -3.84805000 | 3.51187000  | 0.40179000  |
| H | -2.23538000 | 4.25395000  | 0.52091000  |
| H | -3.40780900 | 4.85307000  | -0.66870000 |
| O | -2.17021000 | 1.68001000  | -0.58850000 |
| C | -1.19729000 | 1.56428000  | 0.32722000  |
| O | -0.52756000 | 2.48324000  | 0.78887000  |
| N | -1.01770000 | 0.25700000  | 0.67233000  |
| C | -0.25931000 | -0.09305000 | 1.86532000  |
| H | -0.57849000 | 0.52603000  | 2.71100000  |
| H | -1.71181000 | -0.40680000 | 0.32796000  |
| C | 1.25266000  | 0.14863900  | 1.73890000  |
| O | 1.94677000  | 0.23716900  | 2.75086000  |
| N | 1.74963000  | 0.23226900  | 0.48557000  |
| C | 3.14497000  | 0.50850900  | 0.19683000  |
| H | 3.74005000  | 0.07379900  | 1.00456000  |
| C | 3.50292000  | 2.01074900  | 0.19726000  |
| O | 4.68627000  | 2.34589900  | 0.08135000  |
| N | 2.50027000  | 2.89386900  | 0.32106000  |

|          |             |             |             |
|----------|-------------|-------------|-------------|
| C        | 2.74525000  | 4.32770900  | 0.35692000  |
| H        | 1.78682100  | 4.83898900  | 0.45306000  |
| H        | 3.38072100  | 4.59731900  | 1.20658000  |
| H        | 3.23855100  | 4.66196900  | -0.56063000 |
| H        | 1.09494000  | 0.14012900  | -0.28027000 |
| H        | 1.54794000  | 2.56983900  | 0.45599000  |
| C        | -0.49558000 | -1.57024000 | 2.24319000  |
| H        | -0.20394000 | -2.21774000 | 1.40553000  |
| H        | 0.15094000  | -1.79955100 | 3.09300000  |
| O        | -1.82971000 | -1.82876000 | 2.63979000  |
| H        | -2.36871000 | -1.96047000 | 1.83351000  |
| C        | 3.56720000  | -0.13118100 | -1.14498000 |
| H        | 2.93115000  | 0.26541900  | -1.94493000 |
| H        | 4.58607000  | 0.20838900  | -1.34864000 |
| C        | 3.51127000  | -1.64382100 | -1.14230000 |
| C        | 2.52159000  | -2.33156100 | -1.85415000 |
| C        | 4.46018000  | -2.39001100 | -0.42869000 |
| C        | 2.47295900  | -3.72813100 | -1.84982000 |
| H        | 1.78487000  | -1.77197100 | -2.42401000 |
| C        | 4.41540900  | -3.78409100 | -0.42001000 |
| H        | 5.24474000  | -1.87616100 | 0.12042000  |
| C        | 3.41906900  | -4.45901100 | -1.13070000 |
| H        | 1.69774900  | -4.24146100 | -2.41019000 |
| H        | 5.16113900  | -4.34356100 | 0.13624000  |
| H        | 3.38488900  | -5.54380100 | -1.12669000 |
| O        | -2.91891000 | -1.95906000 | 0.10520000  |
| S        | -4.32834000 | -2.00998000 | -0.51209000 |
| C        | -5.48076000 | -1.55844000 | 0.81595000  |
| C        | -4.73861100 | -3.77311000 | -0.63049000 |
| H(Iso=2) | -5.29096000 | -0.51121000 | 1.05584000  |
| H(Iso=2) | -6.49889000 | -1.67747000 | 0.43794000  |
| H(Iso=2) | -5.30341000 | -2.19727000 | 1.68370000  |
| H(Iso=2) | -5.77589100 | -3.86279000 | -0.96167000 |
| H(Iso=2) | -4.06817100 | -4.20248000 | -1.37651000 |
| H(Iso=2) | -4.58950100 | -4.24184000 | 0.34454000  |

**2( $\delta,\beta$ )-(DMSO)<sub>2</sub>**

|   |             |             |             |
|---|-------------|-------------|-------------|
| C | 4.17357000  | -2.59028100 | -1.51642000 |
| C | 3.07508000  | -3.06538100 | -2.47009000 |
| H | 3.51613000  | -3.72558100 | -3.22387000 |
| H | 2.29420000  | -3.61363100 | -1.94189000 |
| H | 2.62409000  | -2.21321100 | -2.98851000 |
| C | 5.26457000  | -1.84274100 | -2.28509000 |
| H | 4.83971000  | -1.00202100 | -2.84184000 |
| H | 6.02805000  | -1.45996100 | -1.60119000 |
| H | 5.74577000  | -2.52003100 | -2.99655000 |
| C | 4.77924000  | -3.73417100 | -0.69998000 |
| H | 5.52209000  | -3.34846100 | 0.00564000  |
| H | 4.01429000  | -4.28072100 | -0.14708000 |
| H | 5.28452000  | -4.43044100 | -1.37712000 |
| O | 3.64791000  | -1.54401100 | -0.61152000 |
| C | 2.63988000  | -1.78550100 | 0.24938000  |
| O | 2.06218000  | -2.85322000 | 0.39624000  |
| N | 2.33460000  | -0.64973100 | 0.94089000  |
| C | 1.39337000  | -0.67403000 | 2.04701000  |
| H | 1.34817000  | -1.69759000 | 2.43192000  |
| H | 2.95008000  | 0.15468900  | 0.82679000  |
| C | -0.05702000 | -0.32412000 | 1.66371000  |
| O | -0.95938000 | -0.47879000 | 2.49111000  |
| N | -0.25780000 | 0.13834000  | 0.41677000  |
| C | -1.56203000 | 0.51635000  | -0.10927000 |
| H | -2.31726000 | 0.02166000  | 0.50309000  |
| C | -1.63405000 | 0.01779000  | -1.55871000 |
| O | -0.76399000 | 0.35131000  | -2.37317000 |
| N | -2.67079000 | -0.77374000 | -1.86025000 |
| C | -2.86538000 | -1.30760000 | -3.19939000 |
| H | -3.78935000 | -1.88720000 | -3.20899000 |

|          |             |             |             |
|----------|-------------|-------------|-------------|
| H        | -2.94401000 | -0.49967000 | -3.93308000 |
| H        | -2.03369000 | -1.95694000 | -3.49200000 |
| H        | 0.54246000  | 0.23486000  | -0.19512000 |
| H        | -3.31852000 | -1.06015000 | -1.12297000 |
| C        | 1.85987000  | 0.22800000  | 3.20409000  |
| H        | 1.16184000  | 0.09810000  | 4.03373000  |
| H        | 2.85215000  | -0.11021100 | 3.52973000  |
| O        | 1.87061000  | 1.60944000  | 2.88234000  |
| H        | 2.63338000  | 1.79503900  | 2.29589000  |
| C        | -1.75880000 | 2.05390000  | -0.03265000 |
| H        | -1.57014000 | 2.34504000  | 1.00569000  |
| H        | -0.99019000 | 2.52636000  | -0.65208000 |
| C        | -3.13360000 | 2.52030000  | -0.45747000 |
| C        | -4.21980000 | 2.43303000  | 0.42471000  |
| C        | -3.35522000 | 3.04634000  | -1.73662000 |
| C        | -5.49281000 | 2.85401000  | 0.03864000  |
| H        | -4.06576000 | 2.03834000  | 1.42538000  |
| C        | -4.62761000 | 3.46913000  | -2.12809000 |
| H        | -2.52390000 | 3.12969000  | -2.43084000 |
| C        | -5.70152000 | 3.37288000  | -1.24159000 |
| H        | -6.31969000 | 2.78149000  | 0.73838000  |
| H        | -4.77722000 | 3.87692000  | -3.12307000 |
| H        | -6.69046000 | 3.70382000  | -1.54253000 |
| O        | -4.62252000 | -1.64438000 | 0.11053000  |
| S        | -4.67426000 | -2.82380000 | 1.08894000  |
| C        | -4.08638000 | -2.18517000 | 2.68580000  |
| C        | -3.24865000 | -3.88232000 | 0.69746000  |
| H(Iso=2) | -4.84080000 | -1.47687000 | 3.03308000  |
| H(Iso=2) | -4.01542000 | -3.02344000 | 3.38376000  |
| H(Iso=2) | -3.11980000 | -1.69306000 | 2.54949000  |
| H(Iso=2) | -3.20478000 | -4.68701000 | 1.43526000  |
| H(Iso=2) | -3.42716000 | -4.29661000 | -0.29616000 |
| H(Iso=2) | -2.33650000 | -3.28241000 | 0.71203000  |
| O        | 4.02432000  | 1.83666900  | 1.14036000  |
| S        | 4.08041000  | 2.98126900  | 0.10751000  |
| C        | 5.46859000  | 2.56781900  | -0.98326000 |
| C        | 4.83322000  | 4.38184900  | 0.98074000  |
| H(Iso=2) | 5.17677000  | 1.67595900  | -1.53944000 |
| H(Iso=2) | 5.62748000  | 3.40301900  | -1.66930000 |
| H(Iso=2) | 6.35550000  | 2.37667900  | -0.37552000 |
| H(Iso=2) | 5.76560000  | 4.05350900  | 1.44494000  |
| H(Iso=2) | 5.00727000  | 5.18394900  | 0.25971000  |
| H(Iso=2) | 4.11443000  | 4.70586900  | 1.73493000  |

**2(x,β)-(DMSO)<sub>2</sub>**

|   |             |             |             |
|---|-------------|-------------|-------------|
| C | -4.04754000 | 4.00157900  | -0.25051000 |
| C | -4.47318000 | 3.77361000  | 1.20173000  |
| H | -5.29866000 | 4.45058000  | 1.44449000  |
| H | -4.80483000 | 2.74770000  | 1.36577000  |
| H | -3.64387000 | 3.99301900  | 1.88182000  |
| C | -3.59747000 | 5.44891900  | -0.45771000 |
| H | -2.78139000 | 5.70239900  | 0.22575000  |
| H | -3.25427000 | 5.60504900  | -1.48490000 |
| H | -4.43337000 | 6.12764000  | -0.26517000 |
| C | -5.14487000 | 3.63067000  | -1.25051000 |
| H | -4.78428000 | 3.75367000  | -2.27682000 |
| H | -5.48194000 | 2.60245000  | -1.11316000 |
| H | -6.00014000 | 4.29931000  | -1.10954000 |
| O | -2.81379000 | 3.24044900  | -0.54529000 |
| C | -2.77260000 | 1.89438900  | -0.49591000 |
| O | -3.69597000 | 1.15771900  | -0.17644000 |
| N | -1.54188000 | 1.45374900  | -0.87562000 |
| C | -1.14036000 | 0.07305900  | -0.70047000 |
| H | -1.61905000 | -0.33773100 | 0.19720000  |
| H | -0.78434000 | 2.12596900  | -0.90081000 |
| C | 0.38365000  | 0.05257900  | -0.47330000 |
| O | 1.02191000  | 1.10147900  | -0.34592000 |
| N | 0.92916900  | -1.17663100 | -0.41493000 |

|          |             |             |             |
|----------|-------------|-------------|-------------|
| C        | 2.35023900  | -1.42145100 | -0.22468000 |
| H        | 2.83724000  | -0.44804100 | -0.16633000 |
| C        | 2.88919900  | -2.21554100 | -1.42450000 |
| O        | 2.31452900  | -3.24275100 | -1.80355000 |
| N        | 4.01192900  | -1.74299100 | -1.98394000 |
| C        | 4.65708900  | -2.42089100 | -3.09805000 |
| H        | 5.57319900  | -1.88285100 | -3.34537000 |
| H        | 4.90946900  | -3.45213100 | -2.83338000 |
| H        | 4.00771900  | -2.44220100 | -3.97960000 |
| H        | 0.33024900  | -1.96121100 | -0.66533000 |
| H        | 4.40686900  | -0.85550100 | -1.66560000 |
| C        | -1.58701100 | -0.79533100 | -1.90364000 |
| H        | -2.63483000 | -0.55645100 | -2.11606000 |
| H        | -0.99342000 | -0.53734100 | -2.78674000 |
| O        | -1.41905100 | -2.18382100 | -1.66295000 |
| H        | -2.15180100 | -2.49871100 | -1.07944000 |
| C        | 2.62701900  | -2.21972100 | 1.07685000  |
| H        | 2.09615900  | -3.17478100 | 1.01154000  |
| H        | 3.69875900  | -2.44656100 | 1.10215000  |
| C        | 2.23002900  | -1.48250100 | 2.33558000  |
| C        | 0.99857900  | -1.72532100 | 2.95688000  |
| C        | 3.08891000  | -0.53273100 | 2.90635000  |
| C        | 0.62979900  | -1.03390100 | 4.11335000  |
| H        | 0.32459900  | -2.46583100 | 2.53606000  |
| C        | 2.72569000  | 0.16035900  | 4.06159000  |
| H        | 4.05252000  | -0.33648100 | 2.44381000  |
| C        | 1.49216000  | -0.08737100 | 4.66904000  |
| H        | -0.32841100 | -1.23888100 | 4.58077000  |
| H        | 3.40718000  | 0.88892900  | 4.48987000  |
| H        | 1.20910000  | 0.44838900  | 5.56956000  |
| O        | 5.26609000  | 0.81808900  | -1.43864000 |
| S        | 5.28608000  | 1.70875900  | -0.19001000 |
| C        | 4.02752000  | 2.98791900  | -0.46979000 |
| C        | 6.76351000  | 2.75191900  | -0.35265000 |
| H(Iso=2) | 3.06104000  | 2.47946900  | -0.45955000 |
| H(Iso=2) | 4.08375000  | 3.71251900  | 0.34645000  |
| H(Iso=2) | 4.21326000  | 3.46372900  | -1.43562000 |
| H(Iso=2) | 6.76199000  | 3.48307900  | 0.45937000  |
| H(Iso=2) | 7.62797000  | 2.09224900  | -0.26130000 |
| H(Iso=2) | 6.74911000  | 3.24213900  | -1.32863000 |
| O        | -3.37787100 | -3.06927100 | 0.00031000  |
| S        | -4.84575100 | -2.90562000 | -0.43153000 |
| C        | -5.55840100 | -1.68693000 | 0.70805000  |
| C        | -5.69768100 | -4.38490000 | 0.18330000  |
| H(Iso=2) | -5.05930100 | -0.73930000 | 0.49569000  |
| H(Iso=2) | -6.62919100 | -1.60937000 | 0.50380000  |
| H(Iso=2) | -5.37340100 | -2.00886000 | 1.73539000  |
| H(Iso=2) | -6.76930100 | -4.26448000 | 0.00743000  |
| H(Iso=2) | -5.31615100 | -5.23093000 | -0.39048000 |
| H(Iso=2) | -5.48048100 | -4.50540000 | 1.24693000  |

**2( $\beta$ , $\beta$ )-(DMSO)<sub>3</sub>**

|   |             |             |            |
|---|-------------|-------------|------------|
| C | -5.00553000 | -1.82997900 | 1.94513000 |
| C | -4.46328000 | -2.93810900 | 2.85126000 |
| H | -5.29754100 | -3.41192900 | 3.37868000 |
| H | -3.93531100 | -3.70128000 | 2.27830000 |
| H | -3.78259000 | -2.52012000 | 3.59991000 |
| C | -5.75257000 | -0.78059900 | 2.77088000 |
| H | -5.10266000 | -0.36263900 | 3.54569000 |
| H | -6.10503000 | 0.03561100  | 2.13304000 |
| H | -6.61897000 | -1.23914900 | 3.25633000 |
| C | -5.90106000 | -2.37159900 | 0.82849000 |
| H | -6.23100000 | -1.55816900 | 0.17450000 |
| H | -5.38399100 | -3.12150900 | 0.22879000 |
| H | -6.79045000 | -2.83098900 | 1.27191000 |
| O | -3.88952000 | -1.04895000 | 1.37294000 |
| C | -2.96436000 | -1.60760000 | 0.56223000 |
| O | -2.93753000 | -2.77911000 | 0.20817000 |



|          |             |             |             |
|----------|-------------|-------------|-------------|
| N        | -2.06159000 | -0.67006000 | 0.17590000  |
| C        | -0.84159000 | -1.01241000 | -0.52833000 |
| H        | -0.59262000 | -2.05747000 | -0.31893000 |
| H        | -2.06504000 | 0.22702000  | 0.64415000  |
| C        | 0.28322000  | -0.10804000 | 0.00436000  |
| O        | 0.02263000  | 0.91508000  | 0.64571000  |
| N        | 1.52897000  | -0.51495100 | -0.29992000 |
| C        | 2.72204000  | 0.23265900  | 0.06620000  |
| H        | 2.39387000  | 1.10776900  | 0.62799000  |
| C        | 3.46581000  | 0.67748900  | -1.20446000 |
| O        | 3.73954000  | -0.13502100 | -2.09623000 |
| N        | 3.81569100  | 1.97125900  | -1.25002000 |
| C        | 4.56988100  | 2.52295900  | -2.36459000 |
| H        | 4.76649100  | 3.57655900  | -2.16062000 |
| H        | 5.52355100  | 2.00053800  | -2.48965000 |
| H        | 4.00964100  | 2.44089900  | -3.30186000 |
| H        | 1.65416000  | -1.40171100 | -0.79824000 |
| H        | 3.53016100  | 2.60305900  | -0.49638000 |
| C        | -0.98496000 | -0.88100000 | -2.06227000 |
| H        | -0.07772000 | -1.27534000 | -2.52931000 |
| H        | -1.82714000 | -1.51061000 | -2.37544000 |
| O        | -1.15355000 | 0.45338000  | -2.50116000 |
| H        | -2.10542000 | 0.69442000  | -2.49745000 |
| C        | 3.68248000  | -0.61243100 | 0.94399000  |
| H        | 3.96053000  | -1.51199100 | 0.38569000  |
| H        | 4.59767000  | -0.02724100 | 1.08732000  |
| C        | 3.10114000  | -0.98635100 | 2.28877000  |
| C        | 2.48793000  | -2.22924100 | 2.49120000  |
| C        | 3.16056000  | -0.08958100 | 3.36480000  |
| C        | 1.94252000  | -2.56650100 | 3.73220000  |
| H        | 2.44083000  | -2.94109100 | 1.67234000  |
| C        | 2.61812000  | -0.42178100 | 4.60678000  |
| H        | 3.64084000  | 0.87597900  | 3.23029000  |
| C        | 2.00495000  | -1.66306100 | 4.79445000  |
| H        | 1.47364900  | -3.53619100 | 3.86863000  |
| H        | 2.67888000  | 0.28547900  | 5.42824000  |
| H        | 1.58508000  | -1.92488100 | 5.76052000  |
| O        | 1.70500900  | -3.14944100 | -1.59479000 |
| S        | 3.05778900  | -3.65285100 | -2.11353000 |
| C        | 3.21025000  | -3.02629100 | -3.81088000 |
| C        | 2.80526900  | -5.40910100 | -2.50325000 |
| H(Iso=2) | 4.10350900  | -3.46334100 | -4.26408000 |
| H(Iso=2) | 2.31095900  | -3.29238100 | -4.37104000 |
| H(Iso=2) | 3.31865000  | -1.94481100 | -3.71905000 |
| H(Iso=2) | 3.71166900  | -5.79367100 | -2.97715000 |
| H(Iso=2) | 2.63263900  | -5.92164100 | -1.55545000 |
| H(Iso=2) | 1.93970900  | -5.50945100 | -3.16199000 |
| O        | -3.78068000 | 1.22501000  | -2.79395000 |
| S        | -4.40196900 | 2.25406000  | -1.83890000 |
| C        | -6.18455900 | 1.91033100  | -1.84907000 |
| C        | -4.43759900 | 3.82340100  | -2.75351000 |
| H(Iso=2) | -6.31948000 | 0.93702100  | -1.37520000 |
| H(Iso=2) | -6.69175900 | 2.68430100  | -1.26821000 |
| H(Iso=2) | -6.53816900 | 1.89205100  | -2.88227000 |
| H(Iso=2) | -4.97407900 | 4.56315100  | -2.15431000 |
| H(Iso=2) | -3.39962900 | 4.13207000  | -2.88774000 |
| H(Iso=2) | -4.92407900 | 3.66430100  | -3.71841000 |
| O        | 3.10889100  | 3.80177900  | 0.87589000  |
| S        | 1.84286100  | 4.65657900  | 0.72029000  |
| C        | 2.24337100  | 6.26292900  | 1.46673000  |
| C        | 0.68111100  | 4.05813900  | 1.98008000  |
| H(Iso=2) | 2.99767200  | 6.72787900  | 0.82984000  |
| H(Iso=2) | 1.33802200  | 6.87436900  | 1.48340000  |
| H(Iso=2) | 2.63180100  | 6.10059900  | 2.47467000  |
| H(Iso=2) | -0.19836900 | 4.70686000  | 1.97504000  |
| H(Iso=2) | 0.40803100  | 3.04249900  | 1.68613000  |
| H(Iso=2) | 1.17546100  | 4.06962900  | 2.95423000  |

**2( $\delta,\beta$ )-(DMSO)<sub>3</sub>**

|          |             |             |             |
|----------|-------------|-------------|-------------|
| C        | -3.35971000 | -4.45400100 | -0.80257000 |
| C        | -2.13076000 | -5.28896100 | -1.17079000 |
| H        | -2.42125000 | -6.34185100 | -1.24721000 |
| H        | -1.70459000 | -4.97527100 | -2.12440000 |
| H        | -1.36488000 | -5.20452100 | -0.39312000 |
| C        | -3.94768000 | -4.92573100 | 0.52899000  |
| H        | -3.19660000 | -4.87691100 | 1.32303000  |
| H        | -4.80145000 | -4.30487100 | 0.81708000  |
| H        | -4.28826000 | -5.96117100 | 0.43729000  |
| C        | -4.43064000 | -4.47252100 | -1.89614000 |
| H        | -5.26778000 | -3.82245100 | -1.62182000 |
| H        | -4.02847000 | -4.14739100 | -2.85627000 |
| H        | -4.81512000 | -5.49183100 | -2.00552000 |
| O        | -2.96221000 | -3.06364100 | -0.50042000 |
| C        | -2.38859000 | -2.26556100 | -1.42664000 |
| O        | -2.13491000 | -2.58711100 | -2.58095000 |
| N        | -2.14372000 | -1.03955100 | -0.89270000 |
| C        | -1.50067000 | 0.00727900  | -1.65944000 |
| H        | -1.41552000 | -0.36195100 | -2.68371000 |
| H        | -2.32427000 | -0.90841100 | 0.10085000  |
| C        | -0.05472000 | 0.34041900  | -1.24020000 |
| O        | 0.64985000  | 0.98813000  | -2.02145000 |
| N        | 0.37604000  | -0.10015000 | -0.04146000 |
| C        | 1.72134000  | 0.17489000  | 0.45304000  |
| H        | 2.31069000  | 0.50765000  | -0.40174000 |
| C        | 2.30214000  | -1.13103000 | 1.01683000  |
| O        | 1.75245000  | -1.70816000 | 1.96352000  |
| N        | 3.41300000  | -1.58424000 | 0.42010000  |
| C        | 4.06825000  | -2.80966000 | 0.84925000  |
| H        | 4.96048000  | -2.95589000 | 0.23872000  |
| H        | 4.36310000  | -2.74883000 | 1.90151000  |
| H        | 3.40824000  | -3.67510000 | 0.72848000  |
| H        | -0.28372000 | -0.51958100 | 0.61204000  |
| H        | 3.80487000  | -1.08006000 | -0.38064000 |
| C        | -2.34397000 | 1.28613900  | -1.70976000 |
| H        | -1.84792000 | 2.00180900  | -2.37839000 |
| H        | -3.32351000 | 1.03104900  | -2.13647000 |
| O        | -2.47958000 | 1.81391900  | -0.40135000 |
| H        | -3.08817000 | 2.58581900  | -0.43292000 |
| C        | 1.69702000  | 1.29158000  | 1.52741000  |
| H        | 1.16959000  | 2.14397000  | 1.08686000  |
| H        | 1.10397000  | 0.94016000  | 2.37676000  |
| C        | 3.07165000  | 1.72107000  | 1.99180000  |
| C        | 3.84041000  | 2.60449000  | 1.22058000  |
| C        | 3.60935000  | 1.24871000  | 3.19597000  |
| C        | 5.11188000  | 3.00070000  | 1.63688000  |
| H        | 3.43644000  | 2.99113000  | 0.28875000  |
| C        | 4.88158000  | 1.64235000  | 3.61743000  |
| H        | 3.02545000  | 0.56988000  | 3.81065000  |
| C        | 5.63807000  | 2.51910000  | 2.83816000  |
| H        | 5.68880900  | 3.68874000  | 1.02662000  |
| H        | 5.27808000  | 1.26693000  | 4.55583000  |
| H        | 6.62556000  | 2.82880000  | 3.16541000  |
| O        | 4.63750000  | -0.23417000 | -1.82483000 |
| S        | 4.20120000  | -0.64923000 | -3.23694000 |
| C        | 5.72998000  | -0.75186000 | -4.21197000 |
| C        | 3.49896000  | 0.84113000  | -3.99868000 |
| H(Iso=2) | 6.29901000  | -1.59632000 | -3.81966000 |
| H(Iso=2) | 5.46531000  | -0.93096000 | -5.25683000 |
| H(Iso=2) | 6.28827000  | 0.18005000  | -4.09798000 |
| H(Iso=2) | 3.27557000  | 0.62079000  | -5.04558000 |
| H(Iso=2) | 2.58004000  | 1.05995000  | -3.45078000 |
| H(Iso=2) | 4.21885000  | 1.65820000  | -3.91095000 |
| O        | -1.80691000 | -0.74576100 | 2.03647000  |
| S        | -1.75555000 | -1.97963100 | 2.95009000  |
| C        | -3.33641000 | -1.99047100 | 3.84458000  |
| C        | -0.67459000 | -1.52480100 | 4.33438000  |

|          |             |             |             |
|----------|-------------|-------------|-------------|
| H(Iso=2) | -4.11481000 | -2.20713100 | 3.11140000  |
| H(Iso=2) | -3.30129000 | -2.78001100 | 4.59921000  |
| H(Iso=2) | -3.49437000 | -1.01114100 | 4.30190000  |
| H(Iso=2) | -0.69795000 | -2.33368100 | 5.06911000  |
| H(Iso=2) | 0.32433000  | -1.42096000 | 3.90808000  |
| H(Iso=2) | -1.02470000 | -0.58541100 | 4.76820000  |
| O        | -4.24695100 | 3.91510900  | -0.46001000 |
| S        | -3.67935100 | 5.33853900  | -0.57086000 |
| C        | -4.40469100 | 6.26430900  | 0.81237000  |
| C        | -4.59793100 | 6.12827900  | -1.92335000 |
| H(Iso=2) | -3.97621100 | 5.85013900  | 1.72638000  |
| H(Iso=2) | -4.12693100 | 7.31608900  | 0.71060000  |
| H(Iso=2) | -5.48921100 | 6.13603900  | 0.79766000  |
| H(Iso=2) | -4.31356100 | 7.18230900  | -1.96717000 |
| H(Iso=2) | -4.30070100 | 5.62134900  | -2.84275000 |
| H(Iso=2) | -5.66894100 | 6.01197900  | -1.74337000 |

#### 2(β,β)-(DMSO)<sub>4</sub>

|   |             |             |             |
|---|-------------|-------------|-------------|
| C | 1.37314900  | 4.88969000  | -1.83507000 |
| C | -0.07452100 | 5.38137000  | -1.75449000 |
| H | -0.14033100 | 6.38229000  | -2.19360000 |
| H | -0.75211100 | 4.71833000  | -2.29337000 |
| H | -0.39721100 | 5.44740000  | -0.71037000 |
| C | 2.30317900  | 5.84427000  | -1.08249000 |
| H | 1.98942900  | 5.94839000  | -0.03933000 |
| H | 3.33373900  | 5.47673000  | -1.10195000 |
| H | 2.27931900  | 6.83240000  | -1.55129000 |
| C | 1.84977900  | 4.70785000  | -3.27869000 |
| H | 2.86894900  | 4.30816000  | -3.29653000 |
| H | 1.19520900  | 4.03455000  | -3.83329000 |
| H | 1.85854900  | 5.68056000  | -3.78143000 |
| O | 1.53042900  | 3.63170000  | -1.08262000 |
| C | 0.86414000  | 2.50240000  | -1.42279000 |
| O | 0.07800000  | 2.39928000  | -2.35810000 |
| N | 1.19999000  | 1.49520000  | -0.58450000 |
| C | 0.62062000  | 0.17636000  | -0.70603000 |
| H | 0.40138000  | -0.00947000 | -1.76015000 |
| H | 1.83202000  | 1.69012000  | 0.19420000  |
| C | -0.68368000 | 0.03983000  | 0.11094000  |
| O | -0.82468000 | 0.61904000  | 1.19051000  |
| N | -1.60562000 | -0.78183000 | -0.43235000 |
| C | -2.83910000 | -1.14993100 | 0.24523000  |
| H | -2.93546000 | -0.49603100 | 1.11293000  |
| C | -2.76783000 | -2.61584100 | 0.70959000  |
| O | -2.46036900 | -3.51842100 | -0.07887000 |
| N | -3.09090000 | -2.83471100 | 1.99292000  |
| C | -3.12043900 | -4.17374100 | 2.55983000  |
| H | -3.43493900 | -4.10037100 | 3.60197000  |
| H | -3.82546900 | -4.81390100 | 2.02006000  |
| H | -2.13206900 | -4.64332000 | 2.51930000  |
| H | -1.39908000 | -1.22873000 | -1.33038000 |
| H | -3.30674000 | -2.04418100 | 2.60706000  |
| C | 1.61093000  | -0.89270000 | -0.22114000 |
| H | 1.91609000  | -0.66173000 | 0.80790000  |
| H | 1.09637000  | -1.86330000 | -0.21506000 |
| O | 2.73307000  | -0.92029000 | -1.08610000 |
| H | 3.46677000  | -1.39014000 | -0.63117000 |
| C | -4.07362000 | -0.97416100 | -0.67444000 |
| H | -3.92865000 | -1.58125100 | -1.57369000 |
| H | -4.93827000 | -1.39035100 | -0.14481000 |
| C | -4.35573000 | 0.46330900  | -1.05109000 |
| C | -4.01091000 | 0.96266900  | -2.31277000 |
| C | -4.98005000 | 1.32758900  | -0.14025000 |
| C | -4.27839000 | 2.29000900  | -2.65701000 |
| H | -3.53291000 | 0.30691900  | -3.03455000 |
| C | -5.24811000 | 2.65432900  | -0.47818000 |
| H | -5.26471000 | 0.95628900  | 0.84067000  |
| C | -4.89718000 | 3.14086900  | -1.74019000 |

|          |             |             |             |
|----------|-------------|-------------|-------------|
| H        | -4.00474000 | 2.65621900  | -3.64171000 |
| H        | -5.73568100 | 3.30589900  | 0.24046000  |
| H        | -5.10858100 | 4.17160900  | -2.00669000 |
| O        | 4.82295000  | -2.14129900 | 0.22952000  |
| S        | 5.09681100  | -3.62080900 | -0.08382000 |
| C        | 5.16818100  | -4.45856900 | 1.52526000  |
| C        | 6.86000100  | -3.71431900 | -0.50634000 |
| H(Iso=2) | 4.15972100  | -4.42755900 | 1.94079000  |
| H(Iso=2) | 5.47537100  | -5.49442900 | 1.36294000  |
| H(Iso=2) | 5.87237100  | -3.93123900 | 2.17243000  |
| H(Iso=2) | 7.13242100  | -4.76524900 | -0.62903000 |
| H(Iso=2) | 6.98476100  | -3.18231900 | -1.45079000 |
| H(Iso=2) | 7.44378100  | -3.24224900 | 0.28684000  |
| O        | -3.78093000 | -0.67936100 | 3.79952000  |
| S        | -2.67763000 | -0.15539100 | 4.73023000  |
| C        | -3.50944000 | 0.26112900  | 6.29000000  |
| C        | -2.30577000 | 1.52919900  | 4.16603000  |
| H(Iso=2) | -3.85002000 | -0.67878100 | 6.72752000  |
| H(Iso=2) | -2.78537000 | 0.74224900  | 6.95201000  |
| H(Iso=2) | -4.35427000 | 0.92067900  | 6.07932000  |
| H(Iso=2) | -1.59942000 | 1.97998000  | 4.86776000  |
| H(Iso=2) | -1.85005000 | 1.42550000  | 3.17916000  |
| H(Iso=2) | -3.23483000 | 2.10185900  | 4.11698000  |
| O        | -0.87484000 | -1.91373000 | -3.05595000 |
| S        | -1.70499000 | -3.05061000 | -3.66361000 |
| C        | -1.01678900 | -4.59234000 | -2.99531000 |
| C        | -1.11962900 | -3.22051000 | -5.37474000 |
| H(Iso=2) | -1.25167900 | -4.58452000 | -1.92986000 |
| H(Iso=2) | -1.50795900 | -5.43416000 | -3.48986000 |
| H(Iso=2) | 0.06196100  | -4.60628000 | -3.16702000 |
| H(Iso=2) | -1.60156900 | -4.09328000 | -5.82193000 |
| H(Iso=2) | -1.42039000 | -2.31453000 | -5.90351000 |
| H(Iso=2) | -0.03232900 | -3.32527000 | -5.37148000 |
| O        | 3.00849000  | 1.84161000  | 1.73856000  |
| S        | 4.48480000  | 2.14482100  | 1.46371000  |
| C        | 5.42737000  | 0.78587100  | 2.21505000  |
| C        | 4.95010900  | 3.45533100  | 2.63406000  |
| H(Iso=2) | 5.21164000  | -0.11222900 | 1.63215000  |
| H(Iso=2) | 6.49126000  | 1.02869100  | 2.15251000  |
| H(Iso=2) | 5.11011000  | 0.66607100  | 3.25374000  |
| H(Iso=2) | 6.02582900  | 3.62907100  | 2.55342000  |
| H(Iso=2) | 4.40253900  | 4.35153100  | 2.33808000  |
| H(Iso=2) | 4.67254000  | 3.14658100  | 3.64448000  |
